# Supplementary material for: Organ-specific metabolic pathways distinguish prediabetes, type 2 diabetes, and normal tissues
Source: PubMed Central journal article supplement (PMC9589007; doi:10.1016/j.xcrm.2022.100763), 2022-10-04
Supplement: mmc3.pdf [file mmc3.pdf]

# Organ-specific metabolic pathways distinguish prediabetes, type 2 diabetes, and normal tissues

## Graphical abstract

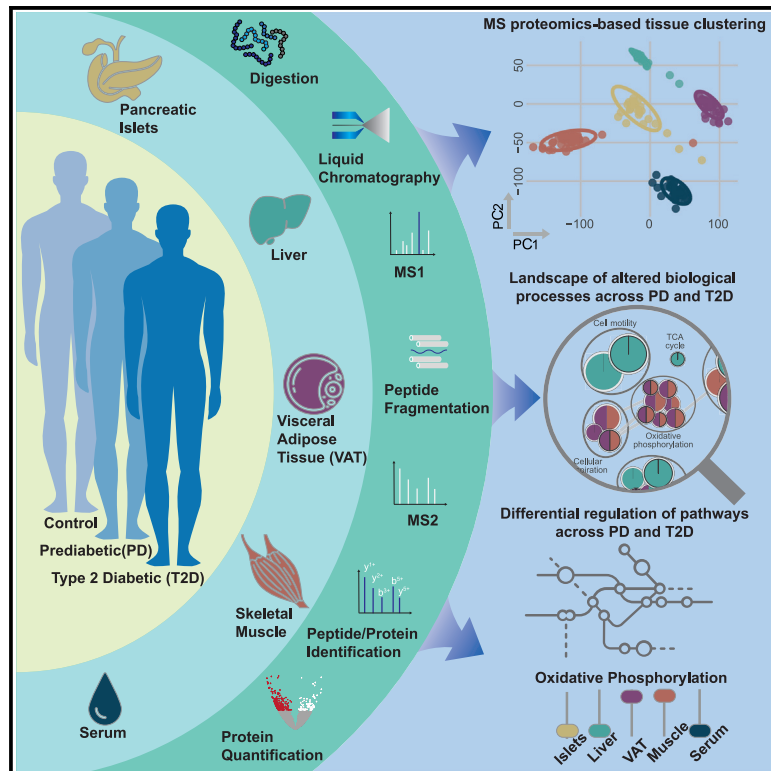

## Authors

Klev Diamanti, Marco Cavalli, Maria J. Pereira, ..., Olle Korsgren, Jan W. Eriksson, Claes Wadelius

## Correspondence

claes.wadelius@igp.uu.se

## In brief

Diamanti et al. map the proteome of five key metabolic tissues of 43 healthy, prediabetes (PD), and type 2 diabetes (T2D) multi-organ donors. The exploration of tissue-specific biological processes indicates that pancreatic islets show multiple biological alterations in PD, while other tissues demonstrate widespread perturbations in T2D.

## Highlights

- Mass spectrometry proteomics of 5 key metabolic tissues from 43 multi-organ donors
- The study provides a map of tissue-specific metabolic dysregulations in PD and T2D
- Inflammatory, immune, and vascular processes are altered in pancreatic islets in PD
- Lipid and mitochondrial pathways are dysregulated in liver and VAT/muscle in T2D

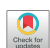

## Article

# Organ-specific metabolic pathways distinguish prediabetes, type 2 diabetes, and normal tissues

Klev Diamanti,<sup>1</sup> Marco Cavalli,<sup>1</sup> Maria J. Pereira,<sup>2</sup> Gang Pan,<sup>1</sup> Casimiro Castillejo-López,<sup>1</sup> Chanchal Kumar,<sup>3,4,14</sup> Filip Mundt,<sup>5,6</sup> Jan Komorowski,<sup>7,8,9,10</sup> Atul S. Deshmukh,<sup>5,11</sup> Matthias Mann,<sup>5,12</sup> Olle Korsgren,<sup>1,13</sup> Jan W. Eriksson,<sup>2</sup> and Claes Wadelius<sup>1,15,\*</sup>

<sup>1</sup>Department of Immunology, Genetics and Pathology, Science for Life Laboratory, Uppsala University, Uppsala, Sweden

<sup>2</sup>Department of Medical Sciences, Clinical Diabetes and Metabolism, Uppsala University, Uppsala, Sweden

<sup>3</sup>Translational Science & Experimental Medicine, Early Cardiovascular, Renal and Metabolism, BioPharmaceuticals R&D, AstraZeneca, Gothenburg, Sweden

<sup>4</sup>Karolinska Institutet/AstraZeneca Integrated CardioMetabolic Center (KI/AZ ICMC), Department of Medicine, Novum, Huddinge, Sweden

<sup>5</sup>Novo Nordisk Foundation Center for Protein Research, Faculty of Health Sciences, University of Copenhagen, Copenhagen, Denmark

<sup>6</sup>Department of Oncology-Pathology, Karolinska Institute, Stockholm, Sweden

<sup>7</sup>Science for Life Laboratory, Department of Cell and Molecular Biology, Uppsala University, Uppsala, Sweden

<sup>8</sup>Institute of Computer Science, Polish Academy of Sciences, Warsaw, Poland

<sup>9</sup>Washington National Primate Research Center, Seattle, WA, USA

<sup>10</sup>Swedish Collegium for Advanced Study, Uppsala, Sweden

<sup>11</sup>Novo Nordisk Foundation Center for Basic Metabolic Research, Faculty of Health and Medical Science, University of Copenhagen, Copenhagen, Denmark

<sup>12</sup>Department of Proteomics and Signal Transduction, Max Planck Institute of Biochemistry, Martinsried, Germany

<sup>13</sup>Department of Medicine, University of Gothenburg, Gothenburg, Sweden

<sup>14</sup>Present address: Translational and Disease Understanding, Research and Development, Grünenthal Ltd, Stokenchurch, UK

<sup>15</sup>Lead contact

\*Correspondence: [claes.wadelius@igp.uu.se](mailto:claes.wadelius@igp.uu.se)

<https://doi.org/10.1016/j.xcrm.2022.100763>

## SUMMARY

Environmental and genetic factors cause defects in pancreatic islets driving type 2 diabetes (T2D) together with the progression of multi-tissue insulin resistance. Mass spectrometry proteomics on samples from five key metabolic tissues of a cross-sectional cohort of 43 multi-organ donors provides deep coverage of their proteomes. Enrichment analysis of Gene Ontology terms provides a tissue-specific map of altered biological processes across healthy, prediabetes (PD), and T2D subjects. We find widespread alterations in several relevant biological pathways, including increase in hemostasis in pancreatic islets of PD, increase in the complement cascade in liver and pancreatic islets of PD, and elevation in cholesterol biosynthesis in liver of T2D. Our findings point to inflammatory, immune, and vascular alterations in pancreatic islets in PD that are hypotheses to be tested for potential contributions to hormonal perturbations such as impaired insulin and increased glucagon production. This multi-tissue proteomic map suggests tissue-specific metabolic dysregulations in T2D.

## INTRODUCTION

Insufficient secretion of insulin from pancreatic  $\beta$  cells and poor sensitivity to insulin from multiple tissues are important for the development of type 2 diabetes (T2D) that, in turn, is often followed by late complications, disability, increased mortality, and increased health care costs. High-energy diet, genetic factors, and limited physical activity leading to obesity are predisposing factors that lead to an increased risk for T2D.<sup>1,2</sup> Besides genetic factors, various cellular components, such as proteins and metabolites, have been reported to be consistently altered in T2D, partly driven by environmental factors.<sup>3–5</sup> Several studies have associated the effects of insufficient insulin with specific cellular deregulations, including glucose levels and lipid deposition in tissues and fatty acid uptake and metabolism.<sup>6–8</sup>

The major tissues for the development of T2D include pancreatic islets, various adipose depots, skeletal muscle, liver, intestine, and the central nervous system, but they remain largely understudied.<sup>9</sup> Instead, the majority of studies exploring T2D have focused on easily accessible tissues such as biofluids that exhibit cellular and molecular alterations reflecting events that may take place in the other, primary tissues, thus providing indirect evidence.<sup>9,10</sup> Exploring alterations in biological pathways across the various metabolically relevant tissues and distinct states of T2D would provide an information-rich holistic view of the primary events leading to the disease.

Liquid chromatography (LC) coupled with mass spectrometry (MS) is a methodology that is routinely employed for the identification and quantification of proteins from tissue samples, thus ultimately aiming at discoveries of biological and medical

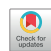

relevance.<sup>11</sup> Technological advances, including sample preparation, data acquisition, and computational processing pipelines, have enhanced the overall analytical capacity of MS proteomics.<sup>12,13</sup> MS proteomics has been utilized in a spectrum of tissues to study multiple diseases spanning from cerebrospinal fluid for Alzheimer's disease to brain for medulloblastoma to induced pluripotent stem cells differentiated into myoblasts for T2D.<sup>14–16</sup> A recent review in insulin-target proteomics of various organs highlighted different pathological processes related to insulin resistance (IR). Specifically, increase in immune- and fibrosis-related proteins in adipose tissue, increase in branched-chain amino acids and mitochondrial proteins in liver, and excessive availability of fatty acids in skeletal muscle have been strongly associated with increased IR.<sup>17</sup>

In this cross-sectional study, we used tissue samples from 43 multi-organ donors and MS-based proteomics to build a map of altered biological processes in prediabetes (PD) and T2D in visceral adipose tissue (VAT), liver, skeletal muscle, pancreatic islets, and serum. This resource provides an extensive coverage of the proteome of multiple tissues relevant to T2D. We confirmed a substantial fraction of well-characterized markers from the literature, such as the significant downregulation of the citric acid (TCA) cycle in VAT and skeletal muscle, but more importantly, we identified various biological signals and pathways through comparisons across tissues that substantially expand knowledge on PD and T2D. A network of comparisons among healthy control subjects (CTRLs), subjects with PD, and subjects with T2D provided an overview of responses of tissues and highlighted tissue-specific patterns of altered biological processes. In summary, we provide a resource of protein levels and enriched biological processes in the most important tissues involved in the development of T2D.

## RESULTS

A cohort of 43 multi-organ donors of five key metabolic tissues, including VAT, liver, skeletal muscle, pancreatic islets, and serum, was characterized by normoglycemia ( $n = 17$ ), PD ( $n = 14$ ), and T2D ( $n = 12$ ) (Figure 1; Table S1A). Tissue samples were obtained from The Nordic network for Clinical islet Transplantation, supported by the Swedish national strategic research initiative Excellence of Diabetes Research in Sweden. Availability of all five tissues from the same donor was the primary selection criterion in a collection of more than 250 subjects (Figure 1A). The percentage of glycosylated hemoglobin A<sub>1c</sub> (HbA<sub>1c</sub>) in the blood that indicates the average blood sugar levels over 2–3 months is an established clinical marker of T2D. This and the quantification of insulin secreted from pancreatic islets on stimulation (glucose-stimulated insulin secretion [GSIS]) were strongly associated with the groups of CTRL, PD, and T2D. Anthropometric characteristics, including age, body mass index (BMI), and gender, showed minor associations to HbA<sub>1c</sub>, GSIS, and T2D. Medications administered to subjects during the intensive care hospitalization did not show associations to T2D groups (Table S1B).

In a large proteomics analysis on 195 samples, we identified more than 20,000 proteins (Figures 1A, 1B; Table S1C). Overall, the proteome coverage of tissues was larger than earlier studies,

while it overlapped with more than 72% of the proteomes of other studies (Figure 1B; Table S1D).<sup>18–23</sup> One sample and more than 41% of the proteins were excluded from further analysis after a thorough quality-control process (Figures S1A–S1E; Table S1E). Next, we selected as confounding factors clinical and technical variables with median explained variance of proteomics data larger than 1% (Table S1F). Cold ischemic time (CIT), which has been reported to affect the phosphoproteome and potentially the proteome, and the days of hospitalization in the intensive care unit (ICU) were associated to the variance of proteins.<sup>24</sup> Through the same process, BMI and age in all tissues and the percentage of purity of the sample in pancreatic islets were selected as additional covariates (Table S1F).

Correlation analysis showed that 14, 26, and 27 proteins had strong positive or inverse correlations to HbA<sub>1c</sub>, GSIS, and BMI, respectively, and retained weak statistical significance after multiple testing correction (Table S1G). The latter was mainly due to the disproportional dimensionality of the data that contain orders of magnitude more proteins than samples. We performed partial correlations of individual proteins to HbA<sub>1c</sub> while correcting for covariates including and excluding BMI (Table S1H). Choosing  $r = |0.4|$  as the threshold for improved or decreased correlation because of BMI, we concluded that inclusion of BMI as a covariate in the downstream analysis would not influence the associations of proteins to HbA<sub>1c</sub>. Specifically, the number of proteins correlated to HbA<sub>1c</sub> with  $r > |0.4|$  remains unchanged after the inclusion of BMI as a confounding factor (Table S1I). Dimensionality reduction using principal-component analysis (PCA) and uniform manifold approximation and projection (UMAP), as well as hierarchical clustering on protein abundancies, showed limited subgrouping of the subjects (Figures 1C, 1D, S1F, and S1G).

## MS proteomics allows accurate clustering of tissues

We performed a stringent quality control of samples and proteins to identify and remove potential outliers and sources of bias (Figures S1A–S1E). Samples from the PD subject p14 were excluded because of consistently deviating more than 3 standard deviations from the overall median of all proteins of the same tissue (Figure S1A), and the dataset was further processed for downstream analysis (Figures 1B–1E and S1B–S1E). We applied a conservative quality-control approach for proteins to be identified in at least 80% of the samples within the same tissue, which resulted in removing more than 40% of the identified proteins across tissues (Table S1E); liver retained more than 4,000 of the originally identified proteins, pancreatic islets and VAT about 3,000, and skeletal muscle more than 1,500 (Figure 1B). As expected, because of the vast dynamic range of the expressed proteome, serum had the lowest number of identified proteins, mainly because of the high abundance of some proteins (Figure 1B; Table S1E).<sup>25</sup>

Despite the known challenges of MS proteomics in VAT and skeletal muscle, our approach resulted in an extremely deep coverage of the proteome of all tissue samples. We also achieved substantial representation of the proteome of pancreatic islets that to date lacks extensive investigation (Table S1D).<sup>26,27</sup> Proteins identified in single tissues showed strong enrichment for biological pathways and Gene Ontology (GO) biological processes highly relevant to the corresponding tissues (Figures 1B and S2A).

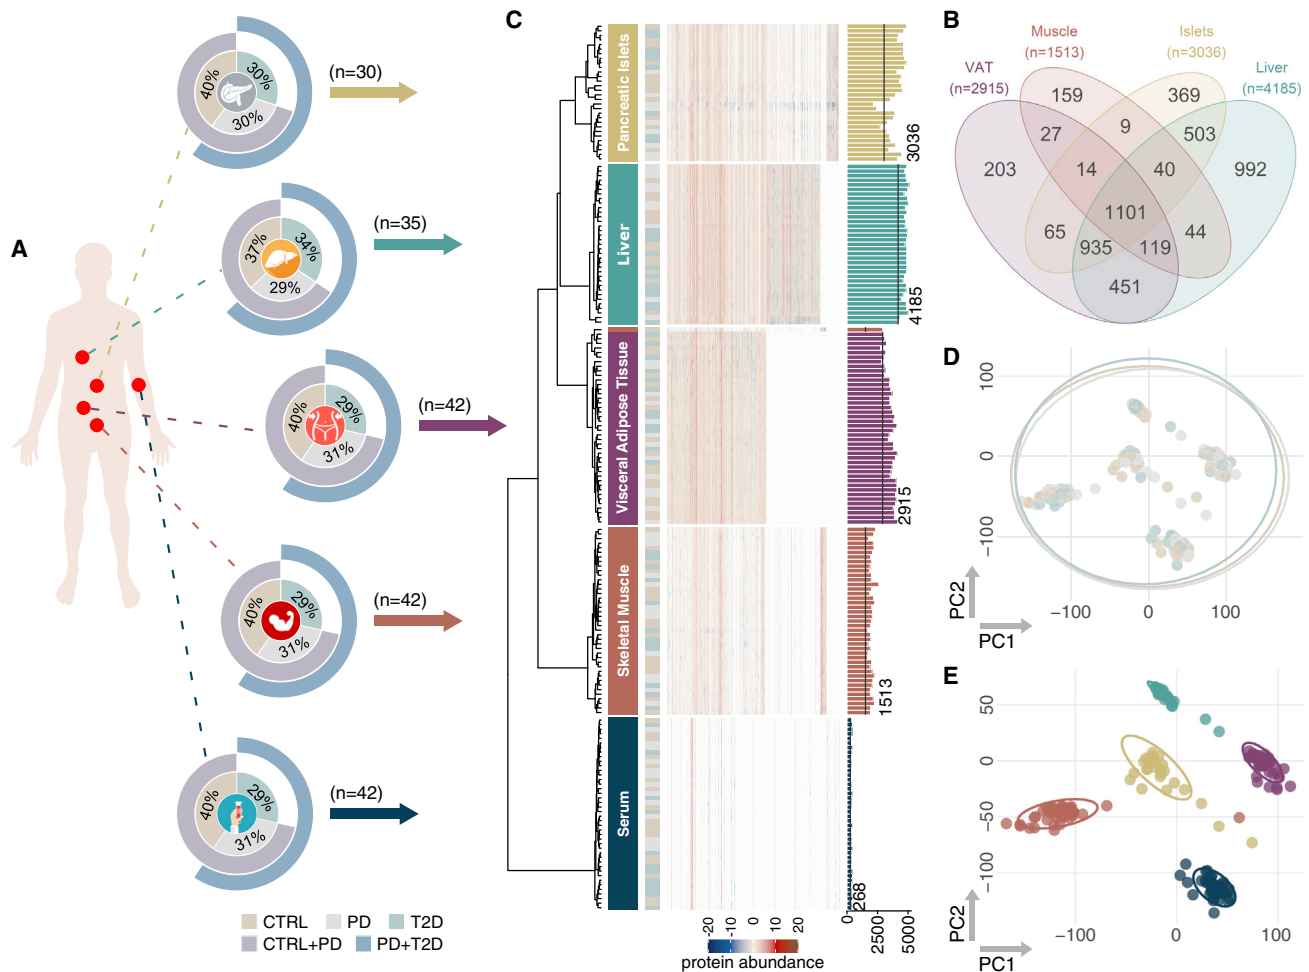

**Figure 1. Overview of the study and exploration of the proteomics dataset**

(A) Schematic overview of tissue samples. Doughnut charts show the distribution of CTRL, PD, and T2D subjects. The two outer circles show the fraction of subjects belonging to the merged groups of CTRL + PD and PD + T2D.

(B) Venn diagram that summarizes tissue-shared and tissue-specific proteins.

(C) Hierarchical clustering of protein abundances across samples. Proteins were clustered using the function *ward.D* from the R package *stats* based on  $1-r$ , where  $r$  is the Pearson correlation coefficient. The dendrogram and the heatmap illustrate clustering and protein intensity, respectively. Tissues are indicated by color and text on the right-hand side of the dendrogram, and the T2D status is shown in the next column. The right-most bar plot shows number of identified proteins in each sample prior to filtering, and the black line marks the number of proteins retained after filtering.

(D and E) Principal-component analysis (PCA) of the processed proteomics data of all tissues. The PCA was performed using the function *pca* of the R library *pcaMethods*. (D) Colored by T2D groups; (E) colored by tissues.

Proteins identified only in liver showed enrichment for metabolism of various types of lipids and amino acids ( $q < 0.05$ ), transport of bile acids and salts ( $q < 6 \times 10^{-4}$ ), and steroid biosynthesis ( $q < 0.03$ ). Skeletal muscle was enriched for muscle-specific terms, including muscle contraction ( $q < 8 \times 10^{-3}$ ) and development ( $q < 0.03$ ), as well as ion homeostasis ( $q < 7 \times 10^{-3}$ ), while pancreatic islets were primarily enriched for secretion of hormones ( $q < 0.01$ ) and insulin ( $q < 0.04$ ) and release of signals ( $q < 3 \times 10^{-3}$ ), and serum was enriched for the complement and coagulation cascades ( $q < 0.05$ ) (Figure S2A; Table S1J).

Overall, a set of 1,101 proteins was identified in all tissues excluding serum (Figure 1B), resulting in a collection of more than 600 enriched GO biological processes ( $q < 0.05$ )

(Figures S2B and S1C; Table S1K). The 87 proteins that were identified across all five tissues resulted in many enriched GO biological processes, despite other larger collections of proteins identified among other subsets of tissues (Figures S2B and S2C). Overall, as expected, proteins identified in two or more tissues represented more generic biological functions than the ones identified in single tissues, including post-translational protein modifications ( $q < 10^{-5}$ ), exocytosis ( $q < 0.01$ ), generation of precursor metabolites and energy ( $q < 6 \times 10^{-17}$ ), tissue homeostasis ( $q < 2 \times 10^{-5}$ ), and regulation of cell-cycle G2/M phase transition ( $q < 9.6 \times 10^{-13}$ ) (Figure S2C; Table S1K).

Unsupervised clustering revealed identical proteomics profiles for tissue samples from subjects of the current set that were

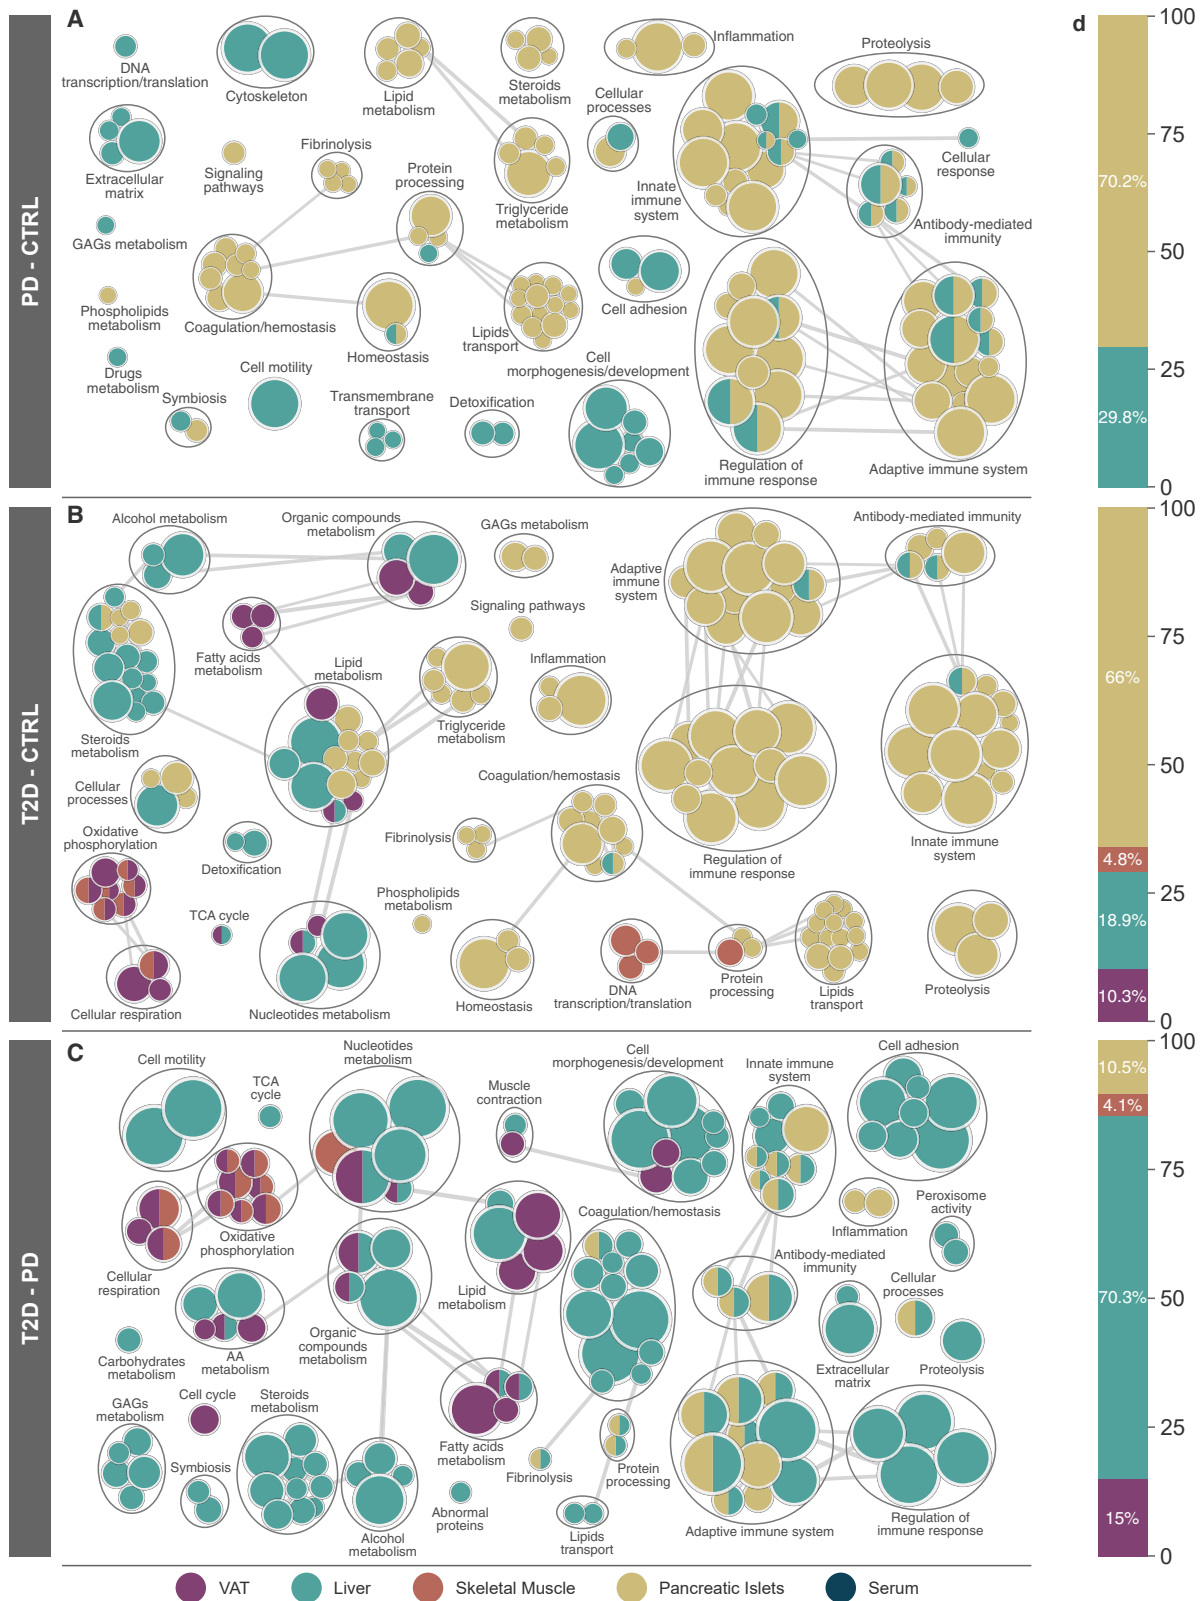

(legend on next page)

analyzed in a pilot study following a different MS acquisition mode, confirming the robustness of the analysis and the high quality of the data (Figure S3). Furthermore, hierarchical clustering and PCA of protein abundancies showed that the tissues of origin carried the strongest biological signature, over the clinical subgrouping of subjects into CTRL, PD, and T2D (Figures 1C and 1E). The most abundant proteins of the muscle sample p42 that clustered with VAT (Figures 1C and S4A) were related to coagulation and immune response and were similar to the ones from a subset of VAT samples (Figures S4B and S4C), while others that were more similar to skeletal muscle expressed muscle-specific signals (Figures S4B and S4D), collectively suggesting contamination of the sample.

### Landscape of altered biological processes in PD and T2D

We performed within-tissue differential analyses for pairwise combinations of CTRL, PD, and T2D while accounting for BMI, age, CIT, days of hospitalization in the ICU, and when applicable, percentage of purity of the pancreatic islets sample (Table S1L). Correlation analysis between Spearman  $r$  of proteins to  $Hb_{A1c}$  (Table S1G) and the log-fold change divided by the standard error from the differential analysis (Table S1L) resulted in  $r = 0.81$  ( $p < 10^{-260}$ ) in liver,  $r = 0.65$  ( $p < 10^{-260}$ ) in pancreatic islets,  $r = 0.7$  ( $p < 2.3 \times 10^{-223}$ ) in skeletal muscle,  $r = 0.73$  ( $p < 10^{-260}$ ) in VAT, and  $r = 0.52$  ( $p < 3.6 \times 10^{-20}$ ) in serum. In other words, the results of the differential analysis showed significant agreement to the correlation analysis between proteins and  $Hb_{A1c}$ . Next, we performed a gene set enrichment analysis to explore the landscape of enriched GO terms across tissues and identify altered biological processes across T2D phenotypes<sup>28–30</sup> (Table S1M). When comparing PD and CTRL, the majority of enriched GO terms occurred in pancreatic islets, while the other tissues had a limited number of significantly altered biological processes, even though a considerable number was enriched in the liver (Figure 2A). The dominance of enriched biological processes in pancreatic islets was slightly reduced when T2D was compared with CTRL (Figure 2B). At the same time, we observed multiple enriched GO terms in skeletal muscle and VAT (Figure 2D). Pancreatic islets showed a limited number of enriched terms when T2D was compared with PD (10%), while over 70% of the same enrichment terms were covered by the liver (Figures 2C and 2D). A similar fraction of enriched terms for skeletal muscle was observed in the T2D-CTRL and T2D-PD networks, while for liver and VAT the largest number of enriched processes was observed in the T2D-PD network, 70% and 15%, respectively (Figures 2B and 2C). In contrast, pancreatic islets were responsible for over 66% of the enriched GO terms in both PD-CTRL and T2D-CTRL (Figures 2A, 2B, and 2D). Overall, the distribution of clusters of GO biological process across tissues varied for different combinations of CTRL, PD, and T2D (Figure S6A). VAT, muscle, and pancreatic islets demonstrated en-

riched GO terms covering similar biological processes, while the liver projected an intermediate state with more diversely enriched groups. Across tissues, pairwise comparison of liver and pancreatic islets, as well as VAT and skeletal muscle, demonstrated large similarities on the patterns of enriched GO terms (Figure S6B).

### Immune and lipid-related processes are upregulated in pancreatic islets of PD

The majority of enriched GO biological processes related to the immune system and its regulation in pancreatic islets were significantly upregulated in PD ( $q_{\max} < 3.7 \times 10^{-3}$ ). Processes related to adaptive and innate immune systems, antibody-mediated immunity, and inflammation were consistently elevated in pancreatic islets ( $q_{\max} < 7.1 \times 10^{-4}$ ), as well as in liver ( $q_{\max} < 5 \times 10^{-3}$ ) of PD. Moreover, terms related to coagulation and homeostasis were also higher in PD of pancreatic islets ( $q_{\max} < 5.8 \times 10^{-3}$ ). Homeostasis was significantly altered in pancreatic islets of PD ( $q_{\max} < 2.5 \times 10^{-3}$ ), both on the fibrinolytic and on the coagulation end, which when taken together with the elevated immune responses create the foundation of a pre-thrombotic state.<sup>31</sup> Lipid metabolism pathways, including metabolism of steroids and triglycerides ( $q_{\max} < 1.2 \times 10^{-3}$ ), and metabolism of lipids, as well as their transport ( $q_{\max} < 2.5 \times 10^{-3}$ ), were significantly increased in PD of pancreatic islets (Figures 2A and S5A).

### Alteration of biological processes in VAT and skeletal muscle of T2D

Biological processes connected to metabolism of steroids and alcohol were almost exclusively upregulated in liver of T2D ( $q_{\max} < 8.4 \times 10^{-3}$ ), while those associated with proteolysis increased in pancreatic islets of T2D ( $q_{\max} < 4.7 \times 10^{-3}$ ). We observed divergent directions in the alterations of the metabolism of organic compounds and nucleotides between liver ( $q_{\max} < 6.7 \times 10^{-3}$ ) and VAT of T2D ( $q_{\max} < 4.8 \times 10^{-3}$ ). We also identified a notable decrease in GO terms related to oxidative phosphorylation (OXPHOS) and cellular respiration in VAT ( $q_{\max} < 4.1 \times 10^{-3}$ ) and skeletal muscle ( $q_{\max} < 3.4 \times 10^{-3}$ ) (Figures 2B and S5B). The latter confirms our observation that enriched GO terms in VAT and muscle share a considerable fraction of ontology terms in T2D (Figure S6B). Various processes related to the metabolism of fatty acids were exclusively decreased in VAT of T2D ( $q_{\max} < 4.2 \times 10^{-3}$ ), while skeletal muscle showed a significant decrease for terms related to DNA transcription and translation in T2D ( $q_{\max} < 5.3 \times 10^{-3}$ ) (Figure 2B).

### Deregulation of various biological processes from PD to T2D in the liver

Comparison of T2D and PD resulted in the largest number of enriched biological processes across tissues, with liver being

**Figure 2. Overview of enriched GO biological processes across tissues for pairwise comparisons among CTRL, PD, and T2D**

(A–C) Networks were created using the *Cytoscape* plugins *EnrichmentMap* and *AutoAnnotate* based on a curated set of custom classes for GO biological processes (Table S1M).<sup>28–30</sup> Nodes represent enriched GO biological processes ( $q < 0.01$ ), and their size indicates the number of proteins in the biological process. Thickness of edges represents the fraction of shared proteins between nodes. Only edges describing high similarity were retained. Groups of nodes represent broader categories of individual GO terms. Panels show comparisons of (A) PD-CTRL, (B) T2D-CTRL, and (C) T2D-PD. (D) Distribution of the enriched GO biological processes across tissues corresponding to the networks on the left-hand side. The distribution is presented as the fraction of enriched terms with respect to the total number of enriched terms for the pairwise comparison.

responsible for over 70% of them and pancreatic islets for less than 11% (Figure 2D). Immune-related terms and their regulatory processes largely occurred in liver ( $q_{\max} < 6.3 \times 10^{-3}$ ) that consists of a shift in comparison with the former networks that compared PD and T2D with CTRL and that were dominated by pancreatic islets (Figures 2C and S6A). This had 2-fold implications on the similarity of inflammatory and immune states between PD and T2D in pancreatic islets and on the late alterations of these biological processes in liver in T2D (Figure S5C). Multiple enriched metabolic processes were exclusively altered in liver, probably because of its higher metabolic activity spanning various metabolic processes ( $q_{\max} < 8.4 \times 10^{-3}$ ). Specifically, metabolic processes of carbohydrates ( $q_{\max} < 8.3 \times 10^{-3}$ ), alcohol ( $q_{\max} < 1.4 \times 10^{-4}$ ), and steroids ( $q_{\max} < 1.3 \times 10^{-3}$ ) were upregulated, whereas metabolism of glycosaminoglycans was downregulated ( $q_{\max} < 8.4 \times 10^{-3}$ ) (Figure 2C). Metabolic processes of amino acids ( $q_{\max} < 8.2 \times 10^{-3}$ ), organic compounds ( $q_{\max} < 3.2 \times 10^{-4}$ ), fatty acids ( $q_{\max} < 3.3 \times 10^{-3}$ ), and lipids ( $q_{\max} < 7.7 \times 10^{-3}$ ) were consistently upregulated in liver and downregulated in VAT ( $q_{\max} < 2.2 \times 10^{-4}$ ,  $q_{\max} < 1.6 \times 10^{-7}$ ,  $q_{\max} < 2.1 \times 10^{-3}$ , and  $q_{\max} < 2.8 \times 10^{-3}$ , respectively) of T2D in comparison with PD (Figure 2C). Similar to T2D-CTRL, OXPHOS and cellular respiration were enriched in muscle ( $q_{\max} < 3.1 \times 10^{-4}$  and  $q_{\max} < 3.3 \times 10^{-5}$ , respectively), as well as VAT ( $q_{\max} < 6.4 \times 10^{-4}$  and  $q_{\max} < 6.9 \times 10^{-5}$ , respectively), and followed the same direction of change (Figures 2C and S5C). Overall, biological processes enriched in the comparison T2D-PD resembled those enriched in T2D-CTRL in muscle and VAT (Figures 2B, 2C, and S6B). The latter did not apply to the same extent in liver, where about half of the biological processes were shared across comparisons (Figure S6B).

### Enrichment of key metabolic pathways across tissues in PD and T2D

We analyzed the dataset for enriched biological pathways similarly to the aforementioned analysis for GO terms (Table S1N). The fraction of enriched biological pathways per tissue ( $q < 0.05$ ) followed the same pattern as the GO biological processes (Figures 2D and S6C). We selected a subset of enriched biological pathways ( $q < 0.05$ ) that we grouped based on biological relevance (Figure 3). The TCA and its contributions of NADH and FADH<sub>2</sub> electron carriers to the OXPHOS have been observed to be decreased in muscle of T2D and in adipose tissue of insulin-resistant subjects.<sup>32–34</sup> Here we observed that the entirety of TCA and OXPHOS were significantly decreased in T2D of VAT and muscle when compared with both CTRL and PD, as well as the merged group of CTRL + PD (Figures 3B, 3C, and S7B). At the same time, pathways related to the complement cascade were significantly increased in PD of liver and pancreatic islets (Figure 3A). In liver of T2D, some of these pathways were significantly lower when compared with both CTRL and PD, suggesting widespread inflammation in PD and the inverse in T2D (Figure S7B). Various resolution levels for biological pathways related to Fc- $\gamma$  and Fc- $\epsilon$  signaling, as well as hemostasis, were significantly higher in PD and T2D in pancreatic islets, with the ones of T2D being significantly lower than the ones in PD (Figure 3). The latter is further confirmed

from the statistical significance between the merged group of PD and T2D to CTRL (Figure S7A; Table S1N) and the lack of significance when PD is considered in combination with CTRL and compared with T2D (Figure S7B; Table S1N). Metabolism of steroids enclosed five different pathways that were all significantly higher in liver of T2D compared with CTRL, while differences between PD and CTRL did not show significance (Figure 3). The similarity of pathways related to metabolism of steroids in liver of PD and CTRL subjects is also demonstrated when they are merged into one non-diabetes group and compared with T2D (Figure S7B). Other enriched pathways included the increase of metabolism of vitamins in pancreatic islets of PD and T2D and the decrease of pathways of neurodegenerative diseases in VAT and liver of T2D (Table S1N).

We also investigated whether the insulin doses that were administered to three subjects from a CTRL while in ICU affected our results (Table S1A). Specifically, we excluded those subjects and reperformed the enrichment analysis of biological pathways and GO terms. Comparison of the significance levels and the normalized enrichment scores between this analysis and the original results showed negligible differences (Figure S8; Table S1O).

### TCA and OXPHOS in VAT and skeletal muscle are significantly decreased in T2D

Mitochondrial function reflected by the TCA cycle and the OXPHOS chain were impaired in T2D in comparison with both CTRL and PD individuals (Figure 4). The same was also found for the biogenesis of the key mitochondrial component complex I, which is the leading component of the reduction in OXPHOS in skeletal muscle and VAT. In contrast, there were no evident differences in these pathways between PD and CTRL subjects (Figures 3A, S9C, and S9D). Analysis of mitochondrion-related GO cellular components revealed significant downregulation for VAT and skeletal muscle for several terms, including mitochondrial matrix ( $q_{\text{VAT}} < 1.1 \times 10^{-5}$  and  $q_{\text{muscle}} < 1.3 \times 10^{-2}$ ), inner mitochondrial membrane protein complex ( $q_{\text{VAT}} < 7.2 \times 10^{-6}$  and  $q_{\text{muscle}} < 1.7 \times 10^{-5}$ ), mitochondrial envelope ( $q_{\text{VAT}} < 2.7 \times 10^{-6}$  and  $q_{\text{muscle}} < 9 \times 10^{-5}$ ), and mitochondrial protein complex ( $q_{\text{VAT}} < 10^{-6}$  and  $q_{\text{muscle}} < 1.7 \times 10^{-5}$ ) (Table S1P).

The entirety of the TCA cycle and the OXPHOS chain was significantly lower in T2D than in CTRL in VAT and skeletal muscle ( $q < 8.8 \times 10^{-8}$  and  $q < 3.2 \times 10^{-4}$ , respectively) (Figure 3; Table S1N). The downregulation of the TCA cycle in VAT and muscle has been described in other studies to be associated with IR.<sup>32–34</sup> The downregulation of pyruvate metabolism and the TCA cycle was driven by 26 proteins in VAT and 17 proteins in skeletal muscle, of which 11 were shared (Figure S9). The vast majority of all eight key enzymatic complexes of the TCA cycle, namely, citrate synthase (CS), aconitase 2 (ACO2), isocitrate dehydrogenase (IDH),  $\alpha$ -ketoglutarate dehydrogenase ( $\alpha$ KGDH), succinyl-CoA synthase (SCS), succinate dehydrogenase (SDH), fumarate hydratase (FH), and malate dehydrogenase (MDH), were reduced in VAT and/or skeletal muscle of T2D, hence confirming the significant downregulation of the entire pathway. The NADH and FADH<sub>2</sub> electron carriers produced from the TCA cycle are subsequently imported to the OXPHOS

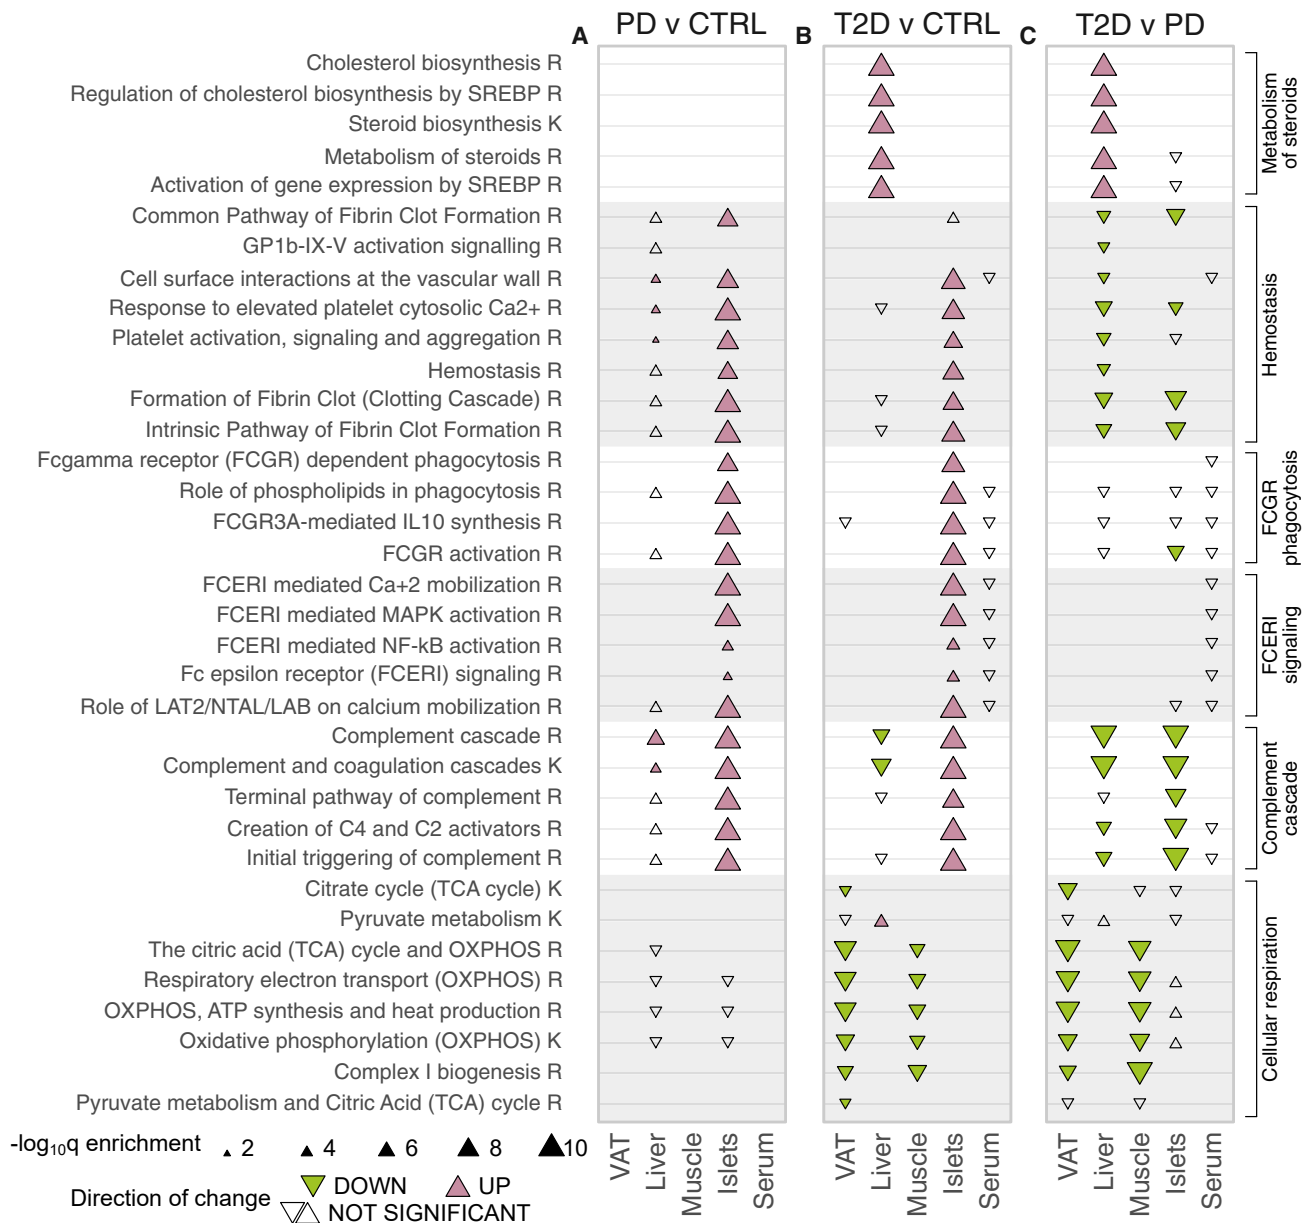

**Figure 3. Significantly enriched biological pathways**

(A–C) Selected groups of enriched biological pathways ( $q \leq 0.5$ ) for pairwise comparisons among CTRL, PD, and T2D, specifically, (A) PD-CTRL, (B) T2D-CTRL, and (C) T2D-PD. Colored triangles indicate statistical significance ( $q < 0.05$ ) and direction. Rows represent pathways, panels represent pairwise comparisons, and columns within panels represent tissues. The database of origin for each pathway is noted with a suffix R or K for Reactome or Kyoto Encyclopedia of Genes and Genomes (KEGG), respectively. GP1b-IX-V, glycoprotein Ib-IX-V; SREBP, sterol regulatory element binding protein.

and utilized for energy production (Figure 4). A large set of 54 proteins from VAT and 27 from skeletal muscle, of which 19 were shared, were marked to drive the overall decrease of the OXPHOS pathway components (Figures 3 and S10). The majority of the driving proteins were moderately higher in PD than in CTRL, but their notable decrease in T2D resulted in the significant decrease of the pathway in both VAT and muscle. In conclusion, we confirm previous knowledge about the downregulation of TCA and OXPHOS in VAT and skeletal muscle in T2D. Further-

more, we extend this knowledge by identifying additional downregulated proteins, which highlights the value of the data.

### Cholesterol biosynthesis is significantly increased in liver of T2D

Multiple steps of the cholesterol biosynthesis pathway were enhanced in liver of T2D compared with PD, as well as CTRL (Figures 3, 5, S7A, and S7B). The increase in liver of T2D subjects ( $q < 1.6 \times 10^{-56}$ ) was mainly driven by 16 proteins that



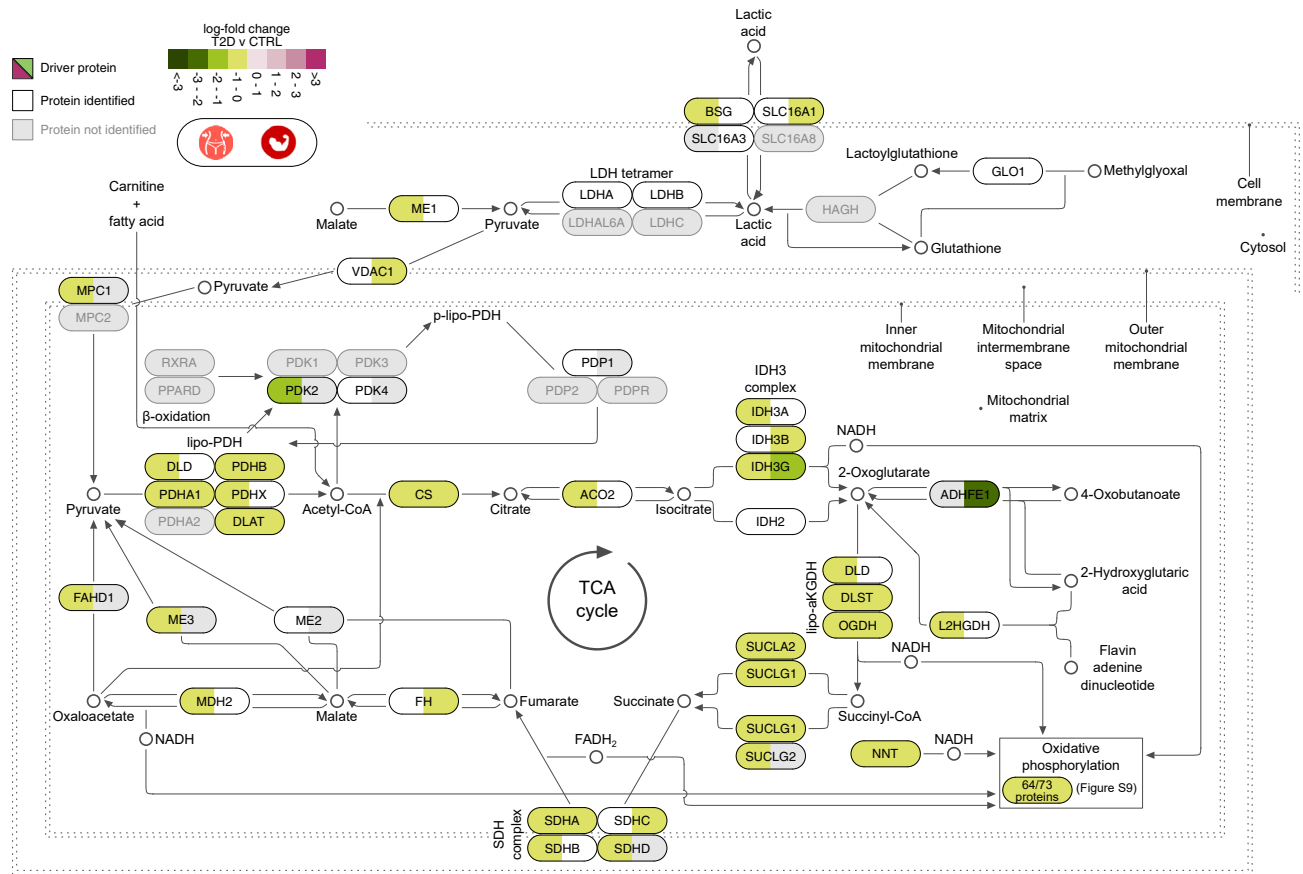

**Figure 4. Biological pathway of pyruvate metabolism and the TCA cycle**

Pathway visualization based on Reactome and complemented with details from KEGG and the literature. Tiles illustrate log-fold change values of T2D compared with CTRL in VAT (left-hand side of tile) and skeletal muscle (right-hand side of tile). Proteins leading the decrease of the pathway are marked as driving and are shown in black font and colored tiles. Proteins participating in the pathway and identified from MS proteomics, but not marked as leading edges, are in white tiles, whereas those in gray were not identified in this analysis.

demonstrated up to 2-fold higher levels when compared with CTRL (Figure 5; Table S1L). Eleven of the 16 proteins are products of the biological pathway that activates gene expression through sterol regulatory element binding proteins (SREBPs) (Figures 3 and 5). Specifically, the expression of, among others, lanosterol demethylase (CYP51A1), 7-dehydrocholesterol reductase (DHCR7), farnesyl diphosphate farnesyltransferase (FDFT1), farnesyl diphosphate synthase (FDPS), hydroxymethylglutaryl CoA synthase (HMGCS1), isopentenyl-diphosphate  $\delta$ -isomerase 1 (IDI1), lanosterol synthase (LSS), diphosphomevalonate decarboxylase (MVD), mevalonate kinase (MVK), squalene monooxygenase (SQLE), and transmembrane 7 superfamily member 2 (TM7SF2) was increased 1- to 2-fold in liver of T2D compared with CTRL (Figure 5B).

The cholesterol biosynthesis pathway initiates with acetyl-CoA that is produced by glycolysis and results in, among others, cholesterol that is utilized for the biosynthesis of steroid hormones and primary bile acids. The MS analysis identified most of the proteins from key steps of the cholesterol biosynthesis pathway (Figure 5A). A detailed exploration on the protein abundancies in liver revealed that despite the moderate significance

of the differences between CTRL and T2D in protein levels, their cumulative impact to the pathway was sufficient to lead to a strong increase (Figures 5B and S11).

### Proteins related to the hemostasis pathway were elevated in pancreatic islets of PD

The blood clot formation pathway of hemostasis was strongly enriched in pancreatic islets of PD ( $q < 3.5 \times 10^{-6}$ ) (Figure 3). Specifically, the enrichment of the clotting cascade ( $q < 8.6 \times 10^{-14}$ ) was led by the upregulation of the common and intrinsic pathways that are responsible for fibrin clot formations ( $q < 1.1 \times 10^{-6}$  and  $q < 4.5 \times 10^{-15}$ , respectively) (Figure 3; Table S1N). A large collection of 44 proteins that were higher in PD than in CTRL drove the identification of the significant increase of the pathway (Figures S12). Visualization of a subset of 21 proteins from the pathway of hemostasis illustrated the key biological processes affected by these enzymes (Figure 6). We observed a greater than 3-fold increase in transferrin (TF) and a solid elevation in multiple members of the serpin family of proteins (Figures 6 and S12A). In addition, we observed that the significant increase of the 44 proteins associated with

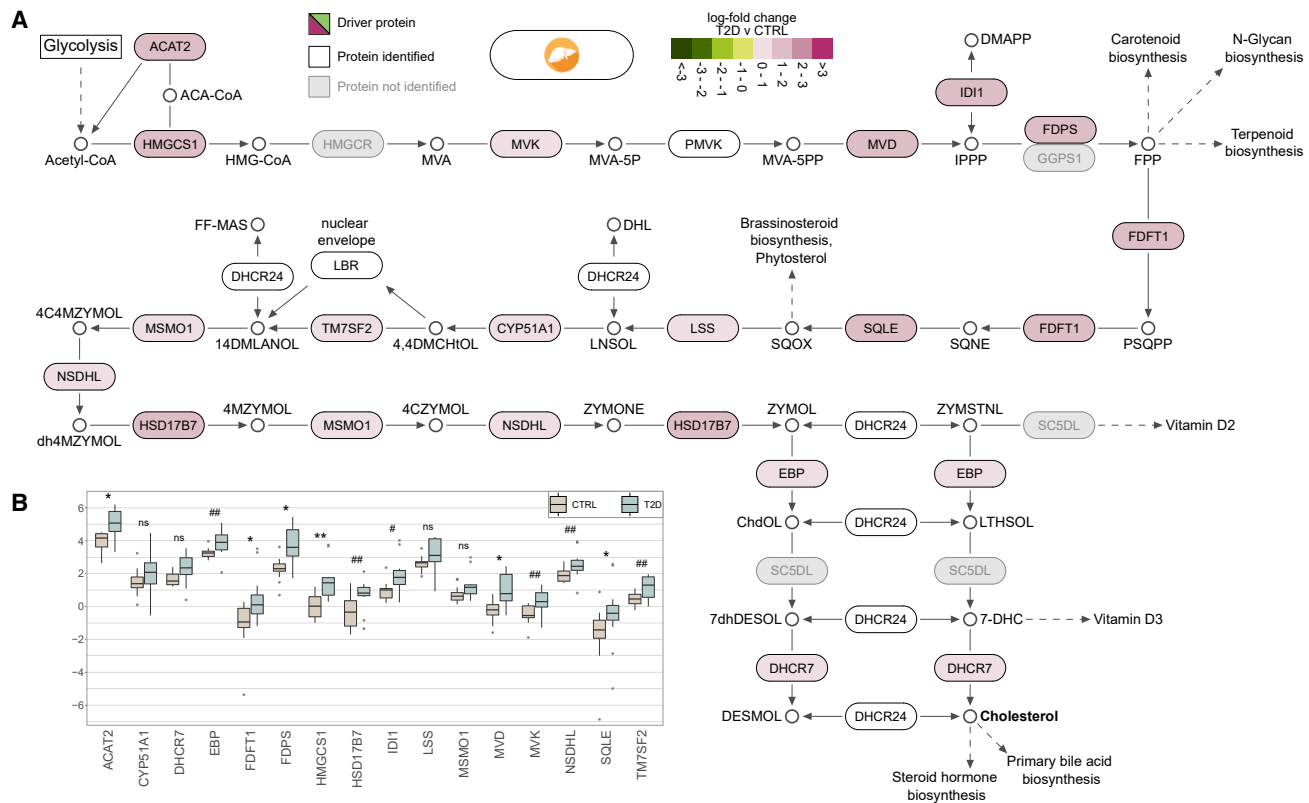

**Figure 5. Detail on the increase of the biological pathway of cholesterol biosynthesis in liver**

(A) Pathway visualization based on Reactome and complemented with details from KEGG and the literature. Tiles illustrate log-fold change values of T2D compared with CTRL in liver. Proteins leading the increase of the pathway are marked as driving and are shown in black font and colored tiles. Proteins participating in the pathway and identified from MS proteomics, but not marked as leading edges, are in white tiles, whereas those in gray were not identified in this analysis.

(B) Detailed comparison of the abundance of driving proteins between T2D and CTRL in liver.

hemostasis was followed by a significant decrease in T2D that, in turn, was significantly higher than CTRL (Figure S12B). In contrast with islets, hemostasis-related pathways in liver were significantly lower in T2D than in PD (Figure 3).

### Complement cascade increases in liver and pancreatic islets of PD

The complement cascade was significantly higher in PD than CTRL in liver and pancreatic islets ( $q < 8.4 \times 10^{-5}$  and  $q < 1.6 \times 10^{-72}$ , respectively) (Figure 3; Table S1N). In detail, the classical and lectin pathways, which are responsible for the creation of the C2 and C4 activators, were strongly elevated in pancreatic islets ( $q < 2.8 \times 10^{-53}$ ) but did not cross the threshold of statistical significance in liver (Figures S13A and S13B). The upregulation of the pathway in liver was led by 20 proteins, while the one in pancreatic islets by 34 proteins, of which 14 were shared (Figures 7, S13A, and S13B). The complement cascade remained higher in T2D than CTRL in pancreatic islets, in contrast with liver, where it significantly decreased (Figure 3). The two tissues were in agreement when comparing T2D with PD. Specifically, the levels of the driving proteins for the upregulation of the complement cascade in PD decreased in T2D, resulting in an overall downregulation of the pathway from PD to

T2D ( $q_{\text{liver}} < 1.4 \times 10^{-14}$  and  $q_{\text{islets}} < 1.1 \times 10^{-16}$ ) (Figures 3, S13C, and S13D). The latter clearly marked an abrupt increase of immune system-related proteins in PD followed by a strong decrease in T2D that in liver led to significantly higher levels in T2D compared with CTRL (Figures S13C and S13D).

### DISCUSSION

We performed a MS-based proteomics analysis of samples from VAT, liver, skeletal muscle, pancreatic islets, and serum from a cohort of 43 multi-organ donors (Figure 1). We provided the deepest proteome coverage to date for multiple tissues, including the poorly studied pancreatic islets (Table S1D) coupled to a thorough conservative quality-control process to ensure the robustness of the results (Figures S1, S3, S4, and S8; Tables S1D–S1I and S1O). We performed a multi-dimensional exploratory analysis that highlighted biological processes and pathways altered along with the development of T2D (Figures 2 and 3). This map of defects in pathways was complemented with a fine-grained collection of proteins that were shown to drive their direction of change, as well as their magnitude (Figures 4, 5, 6, and 7). Our findings highlighted several biological pathways to be significantly altered in PD and T2D and,

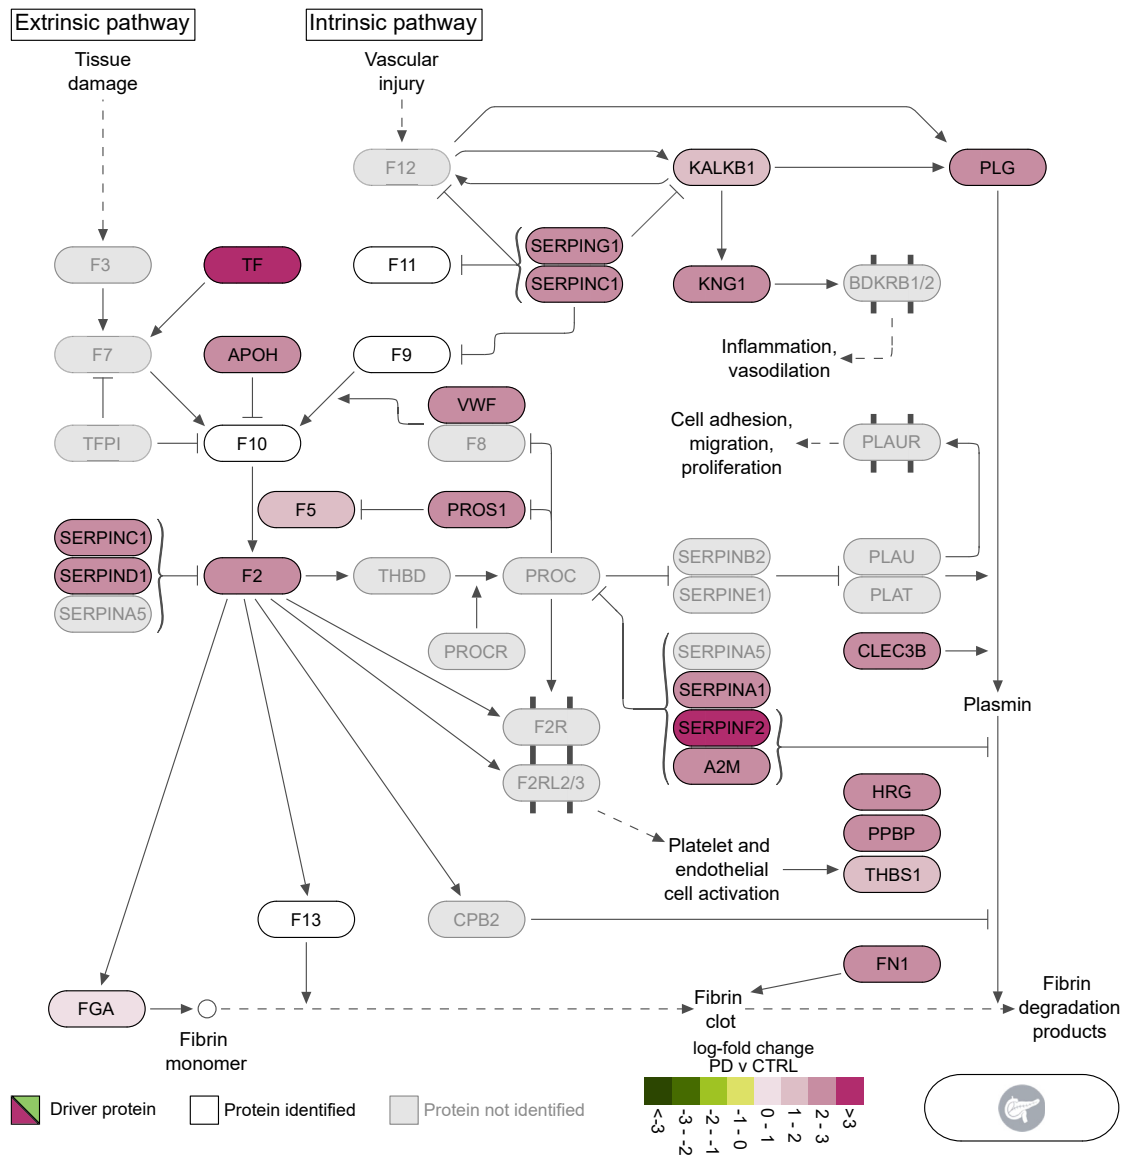

**Figure 6. Biological pathway of hemostasis (coagulation cascade)**

Pathway visualization based on Reactome and complemented with details from KEGG and the literature. Tiles illustrate log-fold change values of PD compared with CTRL in pancreatic islets. Proteins leading the increase of the pathway are marked as driving and are shown in black font and colored tiles. Proteins participating in the pathway and identified from MS proteomics, but not marked as leading edges, are in white tiles, whereas those in gray were not identified in this analysis.

most importantly, paved the way for further intra-individual investigations. Overall, our study provides a resource to the field of metabolic diseases.

It is estimated that 70%–80% of the patients with T2D have non-alcoholic fatty liver disease (NAFLD).<sup>35,36</sup> We compared our results with recent studies that have investigated proteomics for NAFLD in tissues difficult to sample, such as liver and pancreatic islets. The slight decrease of fructose-bisphosphate aldolase B (ALDOB) in T2D of pancreatic islets was not statistically significant, hence it cannot contradict recent findings from Wigger et al.<sup>37</sup> ALDOA was unchanged in all tissues in

agreement with their findings,<sup>37</sup> while ALDOB and ALDOC were increased in T2D of liver (Table S1L). Upregulation of ALDOB in liver has been associated with steatosis in subjects with alcohol-related liver disease (ALD) and NAFLD.<sup>21,22</sup> In contrast, we observed upregulation of glyoxalase I (GLO1) in liver of PD and T2D, the downregulation of which in the same tissue of murine models has been associated with NAFLD.<sup>38</sup>

The vast majority of the biological processes that were enriched in PD and T2D of pancreatic islets and liver were related to immune responses and their regulation (Figures 3A, 3B, S5A, and S5B). Links between the activation of the adaptive

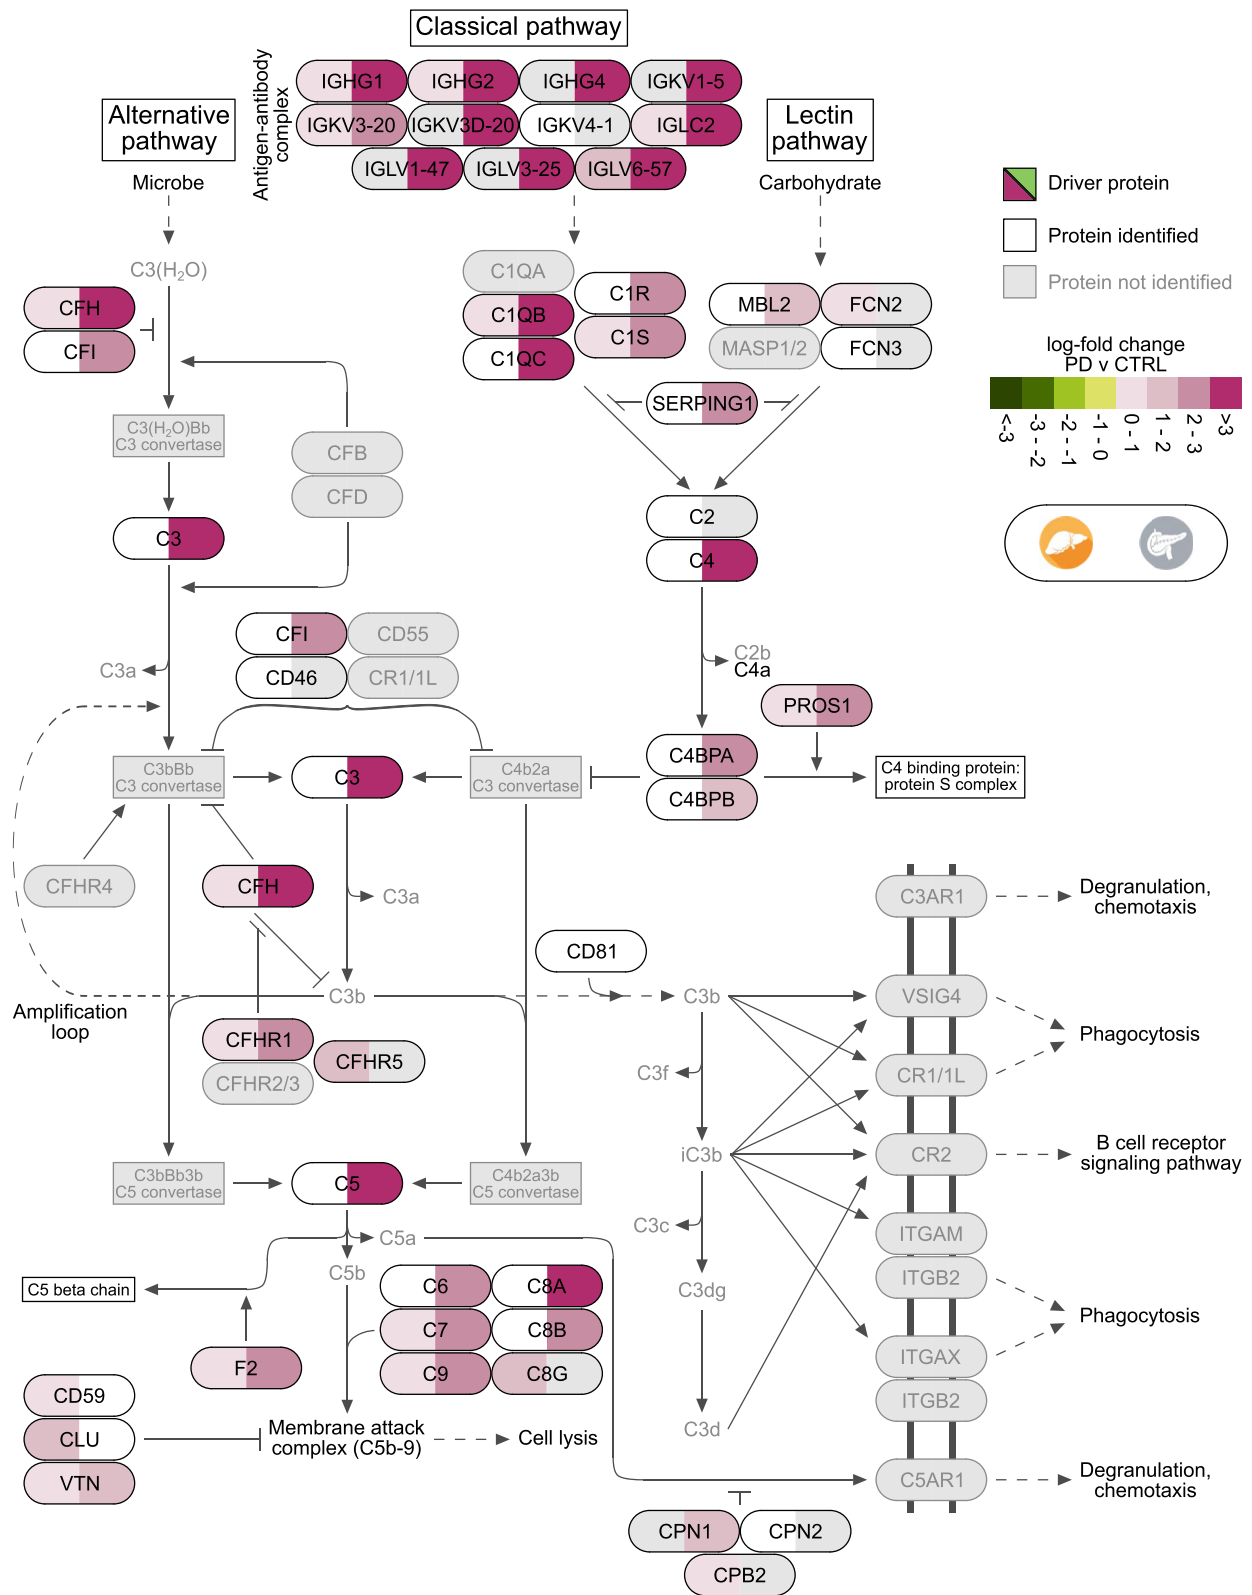

(legend on next page)

and the innate immune system and the progression of T2D have been demonstrated in earlier studies, while other proteomics studies have shown a strong increase in immune response in human islets of T2D subjects.<sup>39–41</sup> The most interesting group in the PD network was the upregulation of biological processes involved in the regulation of the immune response in pancreatic islets and liver (Figures 2A and 5A). Liver also showed divergent patterns of alterations in PD and T2D, while in VAT and skeletal muscle there was a prevalent decrease in T2D (Figures 2A, 2B, S5A, and S5B). Comparison between T2D and PD not only provided insights for the tissues with strong responses to T2D but also underlined significantly affected biological processes (Figure 2C). We observed no enriched biological processes or pathways in PD of VAT and skeletal muscle, while we identified very few differences between PD and T2D in pancreatic islets. In general, pancreatic islets dominated the alterations between PD and CTRL, and in T2D they did not demonstrate further notable alterations (Figure 2). Unlike pancreatic islets, in liver there were over 150 enriched biological processes mainly related to the immune system that differed between PD and T2D (Figure 2C). In summary, our data suggest that most of the biological alterations in PD occur primarily in pancreatic islets and secondarily in liver, and in T2D, alterations related to OXPHOS and cellular respiration become prominent in VAT and skeletal muscle (Figure 2).

The TCA cycle has previously been suggested to be a marker of IR in various tissues that we, in agreement with other studies, find to be strongly downregulated in T2D of skeletal muscle and VAT (Figures 3 and 4).<sup>32–34</sup> Specifically, other proteomics studies have shown the TCA, together with OXPHOS and pyruvate metabolism, to be significantly downregulated in VAT.<sup>20</sup> The amphibolic nature of the pathway involves the synthesis of fatty acids and amino acids, besides driving synthesis of ATP from ADP. In other words, its overall downregulation will affect the ATP production and other important metabolic pathways.<sup>42</sup> The pivotal role of mitochondrial OXPHOS in T2D was highlighted in a recent study that successfully treated T2D in mouse models using magnetic and electric fields.<sup>43</sup> The impairment of the TCA cycle and the OXPHOS chain in VAT and skeletal muscle of T2D subjects compared with CTRL and PD, in combination with the indistinguishable differences between CTRL and PD, suggested a relatively late event becoming evident when diabetes is already established, rather than during its development (Figure 3). Taken together, our data suggested the tissues and the T2D stage at which the downregulation of the TCA cycle and the OXPHOS chain become prominent.

A similar sequence of events applied to the enhanced cholesterol biosynthesis in liver (Figures 3 and 5). This may be driven by the enhanced transcription activation of genes encoding various key enzymes of the pathway and may be linked to subsequent dysregulation of cholesterol and lipoprotein production (Figures 3 and 5). This also became evident in T2D and is likely to be a consequence rather than a cause of the disease. The elevated

level of many enzymes of cholesterol biosynthesis was likely driven by two biological pathways that have SREBP as their core regulator, namely, regulation of cholesterol biosynthesis by SREBP and gene expression activation by SREBP (Figure 3). We hypothesize that it is driven by increased levels and activity of SREBP transcription factors. The latter may subsequently lead to increased synthesis or assembly of other lipid moieties, such as triacylglycerols, and it may favor the production and release into the circulation of lipoproteins, such as very-low-density lipoprotein particles.<sup>44,45</sup>

Liver, skeletal muscle, and VAT are the classical sites for insulin-regulated substrate metabolism, accounting for much of energy expenditure and storage.<sup>46,47</sup> We identified patterns of enhanced lipid, in particular cholesterol, synthesis in the liver, and reduced mitochondrial function, and hence glucose and lipid oxidation, in VAT and skeletal muscle (Figure 3). Taken together, these alterations are compatible with less utilization of energy substrates in muscle and adipose tissue, redistribution of lipids toward the liver, and altered lipoprotein release. It appears that these alterations in energy metabolism occur later than the islet perturbations, and in fact, they can partly be secondary to a relative insulin deficiency. Nonetheless, the alterations in liver, muscle, and VAT are certainly important in maintaining the diabetic state, including hyperglycemia, dyslipidemia, and overweight. The established endocrine dysfunction of the pancreas and adaptive mechanisms of the brain are also involved in “defending” chronic hyperglycemia in T2D.<sup>9,48,49</sup> At the same time, the liver, primarily, and to a lesser extent, the kidneys are responsible for gluconeogenesis that is the major endogenous source of circulating glucose. It is well known that elevated gluconeogenesis is among the main drivers of hyperglycemia in T2D, and the present findings suggested significantly impaired mitochondrial function, which, in turn, can promote gluconeogenesis.<sup>50</sup>

IR with compensatory hyperinsulinemia is a common feature of T2D and impaired glucose tolerance, both of which are associated with increased risk for coronary heart disease (CHD).<sup>51</sup> A partial explanation for the link between IR and CHD can be found in the hypercoagulable state that is characteristic of individuals with PD or T2D.<sup>52</sup> Some studies have indicated a connection between hyperinsulinemia/hyperglycemia and activation of the coagulation cascade following food intake,<sup>53,54</sup> while others have shown a general increase in the risk for venous thromboembolism in patients with T2D.<sup>55</sup> These findings have been further supported by reports that infusion of glucose induces a transient increase in the generation of thrombin (F2) in healthy subjects and of the effect being more pronounced in T2D patients. In addition, animal studies have shown that obesity can lead to increased F2 production in adipose tissue via increased F7 activity; conversely, F2 deletion may protect from adiposity and IR.<sup>56,57</sup> Here, we observed strong elevation in the levels of TF, F2, and several members of the serpin family, including PAI-1, that play important roles in formation and resolution of fibrin

#### Figure 7. Biological pathway of complement cascade

Pathway visualization based on Reactome and complemented with details from KEGG and the literature. Tiles illustrate log-fold change values of PD compared with CTRL in liver (left-hand side of tile) and pancreatic islets (right-hand side of tile). Proteins leading the increase of the pathway are marked as driving and are shown in black font and colored tiles. Proteins participating in the pathway and identified from MS proteomics, but not marked as leading edges, are in white tiles, while those in gray were not identified in this analysis.

clots, and this is thus expected to result in a net prothrombotic effect (Figure 6). Moreover, multiple serine proteases of the coagulation system have been shown to function as alternative activators of C5 and C3 of the complement cascade,<sup>58</sup> which was observed to be significantly elevated in other proteomic analyses of plasma from patients with T2D.<sup>59,60</sup> These pathways were strongly upregulated in PD of pancreatic islets, and the latter was also upregulated in liver of PD (Figures 3, 6, and 7).

It is of great interest that pancreatic islets, in contrast with liver, VAT, and skeletal muscle, displayed strong perturbations of protein patterns in PD individuals compared with CTRLs (Figures 2 and 3). Evidence for increased hemostatic and inflammatory activity in PD was not further enhanced in T2D subjects (Figure 3). Instead, they retained similar patterns to PD for immune responses, while there was even a partial return toward the levels of CTRL with respect to complement activation and hemostasis via platelet and coagulation activation (Figures S12B, S13C, and S13D). In conclusion, these data are compatible with an early, potentially causal role of vascular, inflammatory, and immune impairment within the pancreatic islets that lead to dysfunction of their endocrine cells, which may be manifested by insufficient insulin production and increased glucagon levels.<sup>9,37,61</sup> It could therefore be speculated that there is a vascular/inflammatory insulinitis to pancreatic islets that occurs mainly during diabetes development but later on subsides.

In conclusion, we reported an extensive collection of biological pathways that were found to be altered across several metabolically relevant tissues in the development of T2D. More importantly, we presented a multi-tissue proteomics map describing the tissue-specific metabolic dysregulation across healthy, PD, and T2D subjects.

### Limitations of the study

Subjects enrolled in this study were treated with multiple medications in the ICU, often including glucocorticoids and insulin, which might interact with the underlying metabolic condition to modulate the proteomic data. In ICU patients, temporary hyperglycemia commonly occurs, also in non-diabetic patients, thus patients without diabetes, and obviously those with diabetes, are often given insulin to maintain near normoglycemia. Patients who were not administered insulin maintain an endogenous level of insulin produced by their  $\beta$  cells. Taken together, this indicates that our observed differences in protein profiles between groups are likely related to the chronic glycemic status and not to acute glycemic alterations during ICU care.

Our results would need to be cross-validated in other settings involving additional experimental procedures to be further confirmed and, potentially, explored in clinical studies. We were restricted only to the reported clinical variables because of the Swedish legislation on obtaining details for other underlying diseases and medication that the subjects were administered prior to their admission to the ICU. In our analysis, we have adjusted for potential confounding technical factors including CIT and the purity of the samples of pancreatic islets. The nature of this study that includes factors such as underlying inflammation in subjects and the unavailability of clinical variables might have impacted a fraction of the results. The choice of serum limited us from investigating coagulation factors in blood. In

addition, sampling methods at the different medical facilities and the control of deep-frozen storage chain of the samples may have impacted the results to some extent.

### STAR★METHODS

Detailed methods are provided in the online version of this paper and include the following:

- KEY RESOURCES TABLE
- RESOURCE AVAILABILITY
  - Lead contact
  - Materials availability
  - Data and code availability
- EXPERIMENTAL MODEL AND SUBJECT DETAILS
  - Ethics declaration
  - Sample collection
- METHOD DETAILS
  - Mass spectrometry proteomics
- QUANTIFICATION AND STATISTICAL ANALYSIS
  - Data processing
  - Computational analysis
  - Differential analysis
  - GO and pathway enrichment analysis

### SUPPLEMENTAL INFORMATION

Supplemental information can be found online at <https://doi.org/10.1016/j.xcrm.2022.100763>.

### ACKNOWLEDGMENTS

This work was supported by AstraZeneca (to C.W.); European Commission Marie Skłodowska Curie Innovative Training Network TREATMENT (H2020-MSCA-ITN-721236 to J.W.E. and M.J.P.); Swedish Diabetes Foundation (Swedish Diabetes Association; to C.W., J.W.E., O.K., and M.J.P.); Ernors foundation (to C.W., J.W.E., O.K., and M.J.P.); Excellence for Diabetes Research in Sweden (EXODIAB; to C.W., J.W.E., O.K., and M.J.P.); Zetterling Foundation (to M.J.P.); Swedish Research Council (to O.K.); the Novo Nordisk Foundation (NNF; to O.K. and J.W.E.); eSENCE grant (to J.K.); Uppsala University Hospital ALF grants (to J.W.E.); an unconditional donation from NNF to the NNF Center for Basic Metabolic Research (<http://www.cbmr.ku.dk>) (NNF18CC0034900); and the NNF Center for Protein Research (NNF14CC001). The authors would also like to acknowledge Rebeca Soria Romero and the MS platform from the NNF Center for Protein Research for technical assistance and access to mass spectrometers.

### AUTHOR CONTRIBUTIONS

K.D. analyzed the data, interpreted the results, and wrote the first draft of the manuscript. M.C. prepared samples, prepared curated groups of GO terms, and assisted in writing the manuscript. G.P. prepared samples. M.J.P., J.W.E., O.K., and C.-C.L. interpreted the results and assisted in writing the manuscript. C.K. provided comments on the analysis. M.M., F.M., and A.S.D. performed MS measurements and provided comments on the analysis and the manuscript. J.K. provided the infrastructure for the web-based exploratory tool and contributed to the study design and comments on the manuscript. C.W. designed and supervised the study and assisted in writing the manuscript.

## DECLARATION OF INTERESTS

C.K. is an employee of AstraZeneca. J.W.E. has received research grants and honoraria from AstraZeneca. The other authors declare no competing interests.

Received: May 15, 2021

Revised: July 2, 2022

Accepted: September 13, 2022

Published: October 4, 2022

## REFERENCES

- Chen, L., Magliano, D.J., and Zimmet, P.Z. (2012). The worldwide epidemiology of type 2 diabetes mellitus—present and future perspectives. *Nat. Rev. Endocrinol.* 8, 228–236. <https://doi.org/10.1038/nrendo.2011.183>.
- Prasad, R.B., and Groop, L. (2015). Genetics of type 2 diabetes—pitfalls and possibilities. *Genes* 6, 87–123. <https://doi.org/10.3390/genes6010087>.
- Bellou, V., Belbasis, L., Tzoulaki, I., and Evangelou, E. (2018). Risk factors for type 2 diabetes mellitus: an exposure-wide umbrella review of meta-analyses. *PLoS One* 13, e0194127. <https://doi.org/10.1371/journal.pone.0194127>.
- Diamanti, K., Cavalli, M., Pan, G., Pereira, M.J., Kumar, C., Skrtic, S., Grabherr, M., Riséus, U., Eriksson, J.W., Komorowski, J., and Wadelius, C. (2019). Intra- and inter-individual metabolic profiling highlights carnitine and lysophosphatidylcholine pathways as key molecular defects in type 2 diabetes. *Sci. Rep.* 9, 9653. <https://doi.org/10.1038/s41598-019-45906-5>.
- Roden, M., and Shulman, G.I. (2019). The integrative biology of type 2 diabetes. *Nature* 576, 51–60. <https://doi.org/10.1038/s41586-019-1797-8>.
- Heilbronn, L., Smith, S.R., and Ravussin, E. (2004). Failure of fat cell proliferation, mitochondrial function and fat oxidation results in ectopic fat storage, insulin resistance and type II diabetes mellitus. *Int. J. Obes. Relat. Metab. Disord.* 28, S12–S21. <https://doi.org/10.1038/sj.ijo.0802853>.
- Kusminski, C.M., Shetty, S., Orci, L., Unger, R.H., and Scherer, P.E. (2009). Diabetes and apoptosis: lipotoxicity. *Apoptosis* 14, 1484–1495. <https://doi.org/10.1007/s10495-009-0352-8>.
- Nagle, C.A., Klett, E.L., and Coleman, R.A. (2009). Hepatic triacylglycerol accumulation and insulin resistance. *J. Lipid Res.* 50, S74–S79. <https://doi.org/10.1194/jlr.R800053-JLR200>.
- DeFronzo, R.A. (2009). From the triumvirate to the ominous octet: a new paradigm for the treatment of type 2 diabetes mellitus. *Diabetes* 58, 773–795. <https://doi.org/10.2337/db09-9028>.
- Shin, S.-Y., Fauman, E.B., Petersen, A.-K., Krumsiek, J., Santos, R., Huang, J., Arnold, M., Erte, I., Forgetta, V., Yang, T.-P., et al. (2014). An atlas of genetic influences on human blood metabolites. *Nat. Genet.* 46, 543–550. <https://doi.org/10.1038/ng.2982>.
- Aebersold, R., and Mann, M. (2016). Mass-spectrometric exploration of proteome structure and function. *Nature* 537, 347–355. <https://doi.org/10.1038/nature19949>.
- Bruderer, R., Bernhardt, O.M., Gandhi, T., Xuan, Y., Sondermann, J., Schmidt, M., Gomez-Varela, D., and Reiter, L. (2017). Optimization of experimental parameters in data-independent mass spectrometry significantly increases depth and reproducibility of results. *Mol. Cell. Proteomics* 16, 2296–2309. <https://doi.org/10.1074/mcp.RA117.000314>.
- Kelstrup, C.D., Bekker-Jensen, D.B., Arrey, T.N., Hogrebe, A., Harder, A., and Olsen, J.V. (2018). Performance evaluation of the Q exactive HF-X for shotgun proteomics. *J. Proteome Res.* 17, 727–738. <https://doi.org/10.1021/acs.jproteome.7b00602>.
- Archer, T.C., Ehrenberger, T., Mundt, F., Gold, M.P., Krug, K., Mah, C.K., Mahoney, E.L., Daniel, C.J., LeNail, A., Ramamoorthy, D., et al. (2018). Proteomics, post-translational modifications, and integrative analyses reveal molecular heterogeneity within medulloblastoma subgroups. *Cancer Cell* 34, 396–410.e8. <https://doi.org/10.1016/j.ccell.2018.08.004>.
- Bader, J.M., Geyer, P.E., Müller, J.B., Strauss, M.T., Koch, M., Leypoldt, F., Koertvelyessy, P., Bittner, D., Schipke, C.G., Incesoy, E.I., et al. (2020). Proteome profiling in cerebrospinal fluid reveals novel biomarkers of Alzheimer's disease. *Mol. Syst. Biol.* 16, e9356. <https://doi.org/10.15252/msb.20199356>.
- Batista, T.M., Jayavelu, A.K., Wewer Albrechtsen, N.J., Iovino, S., Lebastchi, J., Pan, H., Dreyfuss, J.M., Krook, A., Zierath, J.R., Mann, M., and Kahn, C.R. (2020). A cell-autonomous signature of dysregulated protein phosphorylation underlies muscle insulin resistance in type 2 diabetes. *Cell Metab.* 32, 844–859.e5. <https://doi.org/10.1016/j.cmet.2020.08.007>.
- Li, Y., Ma, Q., Li, P., Wang, J., Wang, M., Fan, Y., Wang, T., Wang, C., Wang, T., and Zhao, B. (2020). Proteomics reveals different pathological processes of adipose tissue, liver, and skeletal muscle under insulin resistance. *J. Cell. Physiol.* 235, 6441–6461. <https://doi.org/10.1002/jcp.29658>.
- Chae, S., Kim, S.-J., Do Koo, Y., Lee, J.H., Kim, H., Ahn, B.Y., Ha, Y.-C., Kim, Y.-H., Jang, M.G., Koo, K.-H., et al. (2018). A mitochondrial proteome profile indicative of type 2 diabetes mellitus in skeletal muscles. *Exp. Mol. Med.* 50, 1–14. <https://doi.org/10.1038/s12276-018-0154-6>.
- Gómez-Serrano, M., Camafeita, E., García-Santos, E., López, J.A., Rubio, M.A., Sánchez-Pernaute, A., Torres, A., Vázquez, J., and Peral, B. (2016). Proteome-wide alterations on adipose tissue from obese patients as age-diabetes- and gender-specific hallmarks. *Sci. Rep.* 6, 25756. <https://doi.org/10.1038/srep25756>.
- Kim, S.-J., Chae, S., Kim, H., Mun, D.-G., Back, S., Choi, H.Y., Park, K.S., Hwang, D., Choi, S.H., and Lee, S.-W. (2014). A protein profile of visceral adipose tissues linked to early pathogenesis of type 2 diabetes mellitus. *Mol. Cell. Proteomics* 13, 811–822. <https://doi.org/10.1074/mcp.M113.035501>.
- Niu, L., Geyer, P.E., Wewer Albrechtsen, N.J., Gluud, L.L., Santos, A., Doll, S., Treit, P.V., Holst, J.J., Knop, F.K., Vilsbøll, T., et al. (2019). Plasma proteome profiling discovers novel proteins associated with non-alcoholic fatty liver disease. *Mol. Syst. Biol.* 15, e8793. <https://doi.org/10.15252/msb.20188793>.
- Niu, L., Thiele, M., Geyer, P.E., Rasmussen, D.N., Webel, H.E., Santos, A., Gupta, R., Meier, F., Strauss, M., Kjaergaard, M., et al. (2020). A Paired Liver Biopsy and Plasma Proteomics Study Reveals Circulating Biomarkers for Alcohol-Related Liver Disease. <https://doi.org/10.1101/2020.10.16.337592>.
- Öhman, T., Teppo, J., Datta, N., Mäkinen, S., Varjosalo, M., and Koistinen, H.A. (2021). Skeletal muscle proteomes reveal downregulation of mitochondrial proteins in transition from prediabetes into type 2 diabetes. *iScience* 24, 102712. <https://doi.org/10.1016/j.isci.2021.102712>.
- Mertins, P., Yang, F., Liu, T., Mani, D.R., Petyuk, V.A., Gillette, M.A., Clauser, K.R., Qiao, J.W., Gritsenko, M.A., Moore, R.J., et al. (2014). Ischemia in tumors induces early and sustained phosphorylation changes in stress kinase pathways but does not affect global protein levels. *Mol. Cell. Proteomics* 13, 1690–1704. <https://doi.org/10.1074/mcp.M113.036392>.
- Geyer, P.E., Holdt, L.M., Teupser, D., and Mann, M. (2017). Revisiting biomarker discovery by plasma proteomics. *Mol. Syst. Biol.* 13, 942. <https://doi.org/10.15252/msb.20156297>.
- Brackeva, B., Kramer, G., Vissers, J.P.C., and Martens, G.A. (2015). Quantitative proteomics of rat and human pancreatic beta cells. *Data Brief* 3, 234–239. <https://doi.org/10.1016/j.dib.2015.02.019>.
- Metz, T.O., Jacobs, J.M., Gritsenko, M.A., Fontès, G., Qian, W.-J., Camp, D.G., Poitout, V., and Smith, R.D. (2006). Characterization of the human pancreatic islet proteome by two-dimensional LC/MS/MS. *J. Proteome Res.* 5, 3345–3354. <https://doi.org/10.1021/pr060322n>.
- Kucera, M., Isserlin, R., Arkhangorodsky, A., and Bader, G.D. (2016). Auto-Annotate: A Cytoscape App for Summarizing Networks with Semantic Annotations. <https://doi.org/10.12688/f1000research.9090.1>.
- Merico, D., Isserlin, R., Stueker, O., Emili, A., and Bader, G.D. (2010). Enrichment map: a network-based method for gene-set enrichment

- visualization and interpretation. *PLoS One* 5, e13984. <https://doi.org/10.1371/journal.pone.0013984>.
30. Shannon, P., Markiel, A., Ozier, O., Baliga, N.S., Wang, J.T., Ramage, D., Amin, N., Schwikowski, B., and Ideker, T. (2003). Cytoscape: a software environment for integrated models of biomolecular interaction networks. *Genome Res.* 13, 2498–2504. <https://doi.org/10.1101/gr.1239303>.
  31. Maschirow, L., Khalaf, K., Al-Aubaidy, H.A., and Jelinek, H.F. (2015). Inflammation, coagulation, endothelial dysfunction and oxidative stress in prediabetes — biomarkers as a possible tool for early disease detection for rural screening. *Clin. Biochem.* 48, 581–585. <https://doi.org/10.1016/j.clinbiochem.2015.02.015>.
  32. Befroy, D.E., Petersen, K.F., Dufour, S., Mason, G.F., de Graaf, R.A., Rothman, D.L., and Shulman, G.I. (2007). Impaired mitochondrial substrate oxidation in muscle of insulin-resistant offspring of type 2 diabetic patients. *Diabetes* 56, 1376–1381. <https://doi.org/10.2337/db06-0783>.
  33. Gaster, M. (2009). Reduced TCA flux in diabetic myotubes: a governing influence on the diabetic phenotype? *Biochem. Biophys. Res. Commun.* 387, 651–655. <https://doi.org/10.1016/j.bbrc.2009.07.064>.
  34. Heinonen, S., Buzkova, J., Muniandy, M., Kaksonen, R., Ollikainen, M., Ismail, K., Hakkarainen, A., Lundbom, J., Lundbom, N., Vuolteenaho, K., et al. (2015). Impaired mitochondrial biogenesis in adipose tissue in acquired obesity. *Diabetes* 64, 3135–3145. <https://doi.org/10.2337/db14-1937>.
  35. Targher, G., Bertolini, L., Padovani, R., Rodella, S., Tessari, R., Zenari, L., Day, C., and Arcaro, G. (2007). Prevalence of nonalcoholic fatty liver disease and its association with cardiovascular disease among type 2 diabetic patients. *Diabetes Care* 30, 1212–1218. <https://doi.org/10.2337/dc06-2247>.
  36. Williamson, R.M., Price, J.F., Glancy, S., Perry, E., Nee, L.D., Hayes, P.C., Frier, B.M., Van Look, L.A.F., Johnston, G.I., Reynolds, R.M., et al. (2011). Prevalence of and risk factors for hepatic steatosis and nonalcoholic fatty liver disease in people with type 2 diabetes: the edinburgh type 2 diabetes study. *Diabetes Care* 34, 1139–1144. <https://doi.org/10.2337/dc10-2229>.
  37. Wigger, L., Barovic, M., Brunner, A.-D., Marzetta, F., Schöniger, E., Mehl, F., Kipke, N., Friedland, D., Burdet, F., Kessler, C., et al. (2021). Multi-omics profiling of living human pancreatic islet donors reveals heterogeneous beta cell trajectories towards type 2 diabetes. *Nat. Metab.* 3, 1017–1031. <https://doi.org/10.1038/s42255-021-00420-9>.
  38. Spanos, C., Maldonado, E.M., Fisher, C.P., Leenutaphong, P., Oviedo-Orta, E., Windridge, D., Salguero, F.J., Bermúdez-Fajardo, A., Weeks, M.E., Evans, C., et al. (2018). Proteomic identification and characterization of hepatic glyoxalase 1 dysregulation in non-alcoholic fatty liver disease. *Proteome Sci.* 16, 4. <https://doi.org/10.1186/s12953-018-0131-y>.
  39. de Candia, P., Praticchizzo, F., Garavelli, S., De Rosa, V., Galgani, M., Di Rella, F., Spagnuolo, M.I., Colamatteo, A., Fusco, C., Micillo, T., et al. (2019). Type 2 diabetes: how much of an autoimmune disease? *Front. Endocrinol.* 10, 451. <https://doi.org/10.3389/fendo.2019.00451>.
  40. Itariu, B.K., and Stulnig, T.M. (2014). Autoimmune aspects of type 2 diabetes mellitus - a mini-review. *Gerontology* 60, 189–196. <https://doi.org/10.1159/000356747>.
  41. Nyblom, H.K., Bugliani, M., Fung, E., Boggi, U., Zubarev, R., Marchetti, P., and Bergsten, P. (2009). Apoptotic, regenerative, and immune-related signaling in human islets from type 2 diabetes individuals. *J. Proteome Res.* 8, 5650–5656. <https://doi.org/10.1021/pr9006816>.
  42. Gaster, M., Nehlin, J.O., and Minet, A.D. (2012). Impaired TCA cycle flux in mitochondria in skeletal muscle from type 2 diabetic subjects: marker or maker of the diabetic phenotype? *Arch. Physiol. Biochem.* 118, 156–189. <https://doi.org/10.3109/13813455.2012.656653>.
  43. Carter, C.S., Huang, S.C., Searby, C.C., Cassaidy, B., Miller, M.J., Grzesik, W.J., Piorczynski, T.B., Pak, T.K., Walsh, S.A., Acevedo, M., et al. (2020). Exposure to static magnetic and electric fields treats type 2 diabetes. *Cell Metab.* 32, 561–574.e7. <https://doi.org/10.1016/j.cmet.2020.09.012>.
  44. Brown, M.S., and Goldstein, J.L. (1997). The SREBP pathway: regulation of cholesterol metabolism by proteolysis of a membrane-bound transcription factor. *Cell* 89, 331–340. [https://doi.org/10.1016/S0092-8674\(00\)80213-5](https://doi.org/10.1016/S0092-8674(00)80213-5).
  45. Shimano, H., and Sato, R. (2017). SREBP-regulated lipid metabolism: convergent physiology — divergent pathophysiology. *Nat. Rev. Endocrinol.* 13, 710–730. <https://doi.org/10.1038/nrendo.2017.91>.
  46. Hong, S.-H., Ahmadian, M., Yu, R.T., Atkins, A.R., Downes, M., and Evans, R.M. (2014). Nuclear receptors and metabolism: from feast to famine. *Diabetologia* 57, 860–867. <https://doi.org/10.1007/s00125-014-3209-9>.
  47. Viscarra, J.A., and Ortiz, R.M. (2013). Cellular mechanisms regulating fuel metabolism in mammals: role of adipose tissue and lipids during prolonged food deprivation. *Metabolism* 62, 889–897. <https://doi.org/10.1016/j.metabol.2012.12.014>.
  48. Alonge, K.M., D'Alessio, D.A., and Schwartz, M.W. (2021). Brain control of blood glucose levels: implications for the pathogenesis of type 2 diabetes. *Diabetologia* 64, 5–14. <https://doi.org/10.1007/s00125-020-05293-3>.
  49. Lundqvist, M.H., Almy, K., Wiklund, U., Abrahamsson, N., Kamble, P.G., Pereira, M.J., and Eriksson, J.W. (2020). Altered hormonal and autonomic nerve responses to hypo- and hyperglycaemia are found in overweight and insulin-resistant individuals and may contribute to the development of type 2 diabetes. *Diabetologia* 64, 641–655. <https://doi.org/10.1007/s00125-020-05332-z>.
  50. Petersen, M.C., Vatner, D.F., and Shulman, G.I. (2017). Regulation of hepatic glucose metabolism in health and disease. *Nat. Rev. Endocrinol.* 13, 572–587. <https://doi.org/10.1038/nrendo.2017.80>.
  51. Haffner, S.M., and Hanley, A.J.G. (2002). Do increased proinsulin concentrations explain the excess risk of coronary heart disease in diabetic and prediabetic subjects? *Circulation* 105, 2008–2009. <https://doi.org/10.1161/01.CIR.0000016940.94498.49>.
  52. Yamada, T., Sato, A., Nishimori, T., Mitsuhashi, T., Terao, A., Sagai, H., Komatsu, M., Aizawa, T., and Hashizume, K. (2000). Importance of hypercoagulability over hyperglycemia for vascular complication in type 2 diabetes. *Diabetes Res. Clin. Pract.* 49, 23–31. [https://doi.org/10.1016/S0168-8227\(00\)00134-0](https://doi.org/10.1016/S0168-8227(00)00134-0).
  53. Ceriello, A., Taboga, C., Tonutti, L., Giacomello, R., Stel, L., Motz, E., and Pirisi, M. (1996). Post-meal coagulation activation in diabetes mellitus: the effect of acarbose. *Diabetologia* 39, 469–473. <https://doi.org/10.1007/BF00400679>.
  54. Ceriello, A., Giacomello, R., Stel, G., Motz, E., Taboga, C., Tonutti, L., Pirisi, M., Falletti, E., and Bartoli, E. (1995). Hyperglycemia-induced thrombin formation in diabetes: the possible role of oxidative stress. *Diabetes* 44, 924–928. <https://doi.org/10.2337/diab.44.8.924>.
  55. Petrauskienė, V., Falk, M., Waernbaum, I., Norberg, M., and Eriksson, J.W. (2005). The risk of venous thromboembolism is markedly elevated in patients with diabetes. *Diabetologia* 48, 1017–1021. <https://doi.org/10.1007/s00125-005-1715-5>.
  56. Badeanlou, L., Furlan-Freguia, C., Yang, G., Ruf, W., and Samad, F. (2011). Tissue factor–protease-activated receptor 2 signaling promotes diet-induced obesity and adipose inflammation. *Nat. Med.* 17, 1490–1497. <https://doi.org/10.1038/nm.2461>.
  57. Mihara, M., Aihara, K.I., Ikeda, Y., Yoshida, S., Kinouchi, M., Kurahashi, K., Fujinaka, Y., Akaike, M., and Matsumoto, T. (2010). Inhibition of thrombin action ameliorates insulin resistance in type 2 diabetic db/db mice. *Endocrinology* 151, 513–519. <https://doi.org/10.1210/en.2009-0661>.
  58. Amara, U., Rittirsch, D., Flierl, M., Bruckner, U., Klos, A., Gebhard, F., Lambris, J.D., and Huber-Lang, M. (2008). Interaction between the coagulation and complement system. In *Current Topics in Complement II Advances in Experimental Medicine and Biology*, J.D. Lambris, ed. (Springer US), pp. 68–76. [https://doi.org/10.1007/978-0-387-78952-1\\_6](https://doi.org/10.1007/978-0-387-78952-1_6).
  59. Li, R.-X., Chen, H.-B., Tu, K., Zhao, S.-L., Zhou, H., Li, S.-J., Dai, J., Li, Q.-R., Nie, S., Li, Y.-X., et al. (2008). Localized-statistical quantification of



- human serum proteome associated with type 2 diabetes. *PLoS One* 3, e3224. <https://doi.org/10.1371/journal.pone.0003224>.
60. Zhao, Y., Wang, M., Meng, B., Gao, Y., Xue, Z., He, M., Jiang, Y., Dai, X., Yan, D., and Fang, X. (2021). Identification of dysregulated complement activation pathways driven by N-glycosylation alterations in T2D patients. *Front. Chem.* 9, 677621. <https://doi.org/10.3389/fchem.2021.677621>.
  61. D'Alessio, D. (2011). The role of dysregulated glucagon secretion in type 2 diabetes. *Diabetes Obes. Metab.* 13, 126–132. <https://doi.org/10.1111/j.1463-1326.2011.01449.x>.
  62. Deutsch, E.W., Csordas, A., Sun, Z., Jarnuczak, A., Perez-Riverol, Y., Tenrent, T., Campbell, D.S., Bernal-Llinares, M., Okuda, S., Kawano, S., et al. (2017). The ProteomeXchange consortium in 2017: supporting the cultural change in proteomics public data deposition. *Nucleic Acids Res.* 45, D1100–D1106. <https://doi.org/10.1093/nar/gkw936>.
  63. World Health Organization (2016). *Global Report on Diabetes*.
  64. Krogvold, L., Skog, O., Sundström, G., Edwin, B., Buanes, T., Hanssen, K.F., Ludvigsson, J., Grabherr, M., Korsgren, O., and Dahl-Jørgensen, K. (2015). Function of isolated pancreatic islets from patients at onset of type 1 diabetes: insulin secretion can be restored after some days in a nondiabetogenic environment *in vitro*: results from the DiViD study. *Diabetes* 64, 2506–2512. <https://doi.org/10.2337/db14-1911>.
  65. Kulak, N.A., Geyer, P.E., and Mann, M. (2017). Loss-less nano-fractionator for high sensitivity, high coverage proteomics. *Mol. Cell. Proteomics* 16, 694–705. <https://doi.org/10.1074/mcp.O116.065136>.
  66. Cox, J., and Mann, M. (2008). MaxQuant enables high peptide identification rates, individualized p.p.b.-range mass accuracies and proteome-wide protein quantification. *Nat. Biotechnol.* 26, 1367–1372. <https://doi.org/10.1038/nbt.1511>.
  67. Cox, J., Neuhauser, N., Michalski, A., Scheltema, R.A., Olsen, J.V., and Mann, M. (2011). Andromeda: a peptide search engine integrated into the MaxQuant environment. *J. Proteome Res.* 10, 1794–1805. <https://doi.org/10.1021/pr101065j>.
  68. UniProt Consortium (2021). UniProt: the universal protein knowledgebase in 2021. *Nucleic Acids Res.* 49, D480–D489. <https://doi.org/10.1093/nar/gkaa1100>.
  69. Bruderer, R., Bernhardt, O.M., Gandhi, T., Miladinović, S.M., Cheng, L.-Y., Messner, S., Ehrenberger, T., Zanotelli, V., Butscheid, Y., Escher, C., et al. (2015). Extending the limits of quantitative proteome profiling with data-independent acquisition and application to acetaminophen-treated three-dimensional liver microtissues. *Mol. Cell. Proteomics* 14, 1400–1410. <https://doi.org/10.1074/mcp.M114.044305>.
  70. Jassal, B., Matthews, L., Viteri, G., Gong, C., Lorente, P., Fabregat, A., Sidiroopoulos, K., Cook, J., Gillespie, M., Haw, R., et al. (2020). The reactome pathway knowledgebase. *Nucleic Acids Res.* 48, D498–D503. <https://doi.org/10.1093/nar/gkz1031>.
  71. Kanehisa, M., Furumichi, M., Tanabe, M., Sato, Y., and Morishima, K. (2017). KEGG: new perspectives on genomes, pathways, diseases and drugs. *Nucleic Acids Res.* 45, D353–D361. <https://doi.org/10.1093/nar/gkw1092>.
  72. Liberzon, A., Subramanian, A., Pinchback, R., Thorvaldsdóttir, H., Tamayo, P., and Mesirov, J.P. (2011). Molecular signatures database (MSigDB) 3.0. *Bioinformatics* 27, 1739–1740. <https://doi.org/10.1093/bioinformatics/btr260>.
  73. Subramanian, A., Tamayo, P., Mootha, V.K., Mukherjee, S., Ebert, B.L., Gillette, M.A., Paulovich, A., Pomeroy, S.L., Golub, T.R., Lander, E.S., and Mesirov, J.P. (2005). Gene set enrichment analysis: a knowledge-based approach for interpreting genome-wide expression profiles. *Proc. Natl. Acad. Sci. USA.* 102, 15545–15550. <https://doi.org/10.1073/pnas.0506580102>.
  74. Mi, H., Muruganujan, A., Ebert, D., Huang, X., and Thomas, P.D. (2019). PANTHER version 14: more genomes, a new PANTHER GO-slim and improvements in enrichment analysis tools. *Nucleic Acids Res.* 47, D419–D426. <https://doi.org/10.1093/nar/gky1038>.
  75. Ritchie, M.E., Phipson, B., Wu, D., Hu, Y., Law, C.W., Shi, W., and Smyth, G.K. (2015). Limma powers differential expression analyses for RNA-seq and microarray studies. *Nucleic Acids Res.* 43, e47. <https://doi.org/10.1093/nar/gkv007>.
  76. Hoffman, G.E., and Schadt, E.E. (2016). variancePartition: interpreting drivers of variation in complex gene expression studies. *BMC Bioinf.* 17, 483. <https://doi.org/10.1186/s12859-016-1323-z>.
  77. Storey, J.D. (2003). The positive false discovery rate: a Bayesian interpretation and the q-value. *Ann. Statist.* 31, 2013–2035. <https://doi.org/10.1214/aos/1074290335>.
  78. Xiao, Y., Hsiao, T.-H., Suresh, U., Chen, H.-I.H., Wu, X., Wolf, S.E., and Chen, Y. (2014). A novel significance score for gene selection and ranking. *Bioinformatics* 30, 801–807. <https://doi.org/10.1093/bioinformatics/btr671>.

## STAR★METHODS

### KEY RESOURCES TABLE

| REAGENT or RESOURCE                                            | SOURCE                                                                                                                              | IDENTIFIER             |
|----------------------------------------------------------------|-------------------------------------------------------------------------------------------------------------------------------------|------------------------|
| <b>Chemicals, peptides, and recombinant proteins</b>           |                                                                                                                                     |                        |
| Sodium deoxycholate (SDC)                                      | Sigma                                                                                                                               | Cat#30970              |
| Tris (2-carboxyethyl) phosphine                                | Sigma                                                                                                                               | Cat#C4706              |
| Chloroacetamide                                                | Sigma                                                                                                                               | Cat#C0267              |
| LysC                                                           | Wako                                                                                                                                | Cat#4548995075888      |
| Trypsin                                                        | Promega                                                                                                                             | Cat#V5111              |
| Acetonitrile                                                   | Sigma                                                                                                                               | Cat#75-05-8            |
| 25% LC-MS grade ammonia                                        | Fisher chemical                                                                                                                     | Cat#533003             |
| Trifluoroacetic acid                                           | Sigma                                                                                                                               | Cat#76-05-1            |
| Water, Optima L/MS Grade                                       | Sigma                                                                                                                               | Cat#76-05-1            |
| <b>Deposited data</b>                                          |                                                                                                                                     |                        |
| Proteomics Identifications Database (PRIDE)                    |                                                                                                                                     | PXD027597              |
| Full analysis pipeline                                         | <a href="https://github.com/klevdiamanti/multi-tissue_ms_proteomics">https://github.com/klevdiamanti/multi-tissue_ms_proteomics</a> |                        |
| <b>Software and algorithms</b>                                 |                                                                                                                                     |                        |
| Cytoscape v3.7                                                 | Shannon et al., 2003                                                                                                                |                        |
| EnrichmentMap v3.3                                             | Merico et al., 2010                                                                                                                 |                        |
| AutoAnnotate v1.3.3                                            | Kucera et al., 2016                                                                                                                 |                        |
| limma v3.42.2                                                  | Ritchie et al., 2015                                                                                                                |                        |
| Camera                                                         | Wu et al., 2012                                                                                                                     |                        |
| fgsea v1.12.0                                                  | Korotkevich et al., 2019                                                                                                            |                        |
| MaxQuant v1.6.0.1                                              | Cox and Mann 2008                                                                                                                   |                        |
| Andromeda                                                      | Cox et al., 2011                                                                                                                    |                        |
| Spectronaut v13                                                | Bruderer et al., 2015                                                                                                               |                        |
| <b>Other</b>                                                   |                                                                                                                                     |                        |
| MSigDB v7.2 (19 September 2020)                                | Liberzon et al., 2011                                                                                                               |                        |
| UniProt                                                        | The UniProt Consortium, 2021                                                                                                        |                        |
| GO (from MSigDB v7.2)                                          | Subramanian et al., 2005                                                                                                            |                        |
| GOslim (02 May 2020)                                           | Mi et al., 2019                                                                                                                     |                        |
| KEGG (from MSigDB v7.2)                                        | Kanehisa et al., 2017                                                                                                               |                        |
| Reactome (from MSigDB v7.2)                                    | Jassal et al., 2020                                                                                                                 |                        |
| Empore SPE SDB-RPS disc                                        | Sigma                                                                                                                               | Cat#66886-U            |
| Reposil-Pur Basic C18, 1.9 $\mu$ m                             | Dr. Maisch GmbH                                                                                                                     | Cat#r119.b9            |
| EASY-Nlc 1200 system                                           | Thermo Fisher                                                                                                                       | Cat#LC140              |
| Q Exactive™ HF-X Hybrid Quadrupole-Orbitrap™ Mass Spectrometer | Thermo Fisher                                                                                                                       | Cat#IQLAAEGAAPFALGMBFZ |

### RESOURCE AVAILABILITY

#### Lead contact

Further information and requests should be directed to and will be fulfilled by the lead contact, Prof. Claes Wadelius ([claes.wadelius@igp.uu.se](mailto:claes.wadelius@igp.uu.se)).

#### Materials availability

This study did not generate new unique reagents.

### Data and code availability

The mass spectrometry proteomics data have been deposited to the ProteomeXchange Consortium (<http://proteomecentral.proteomexchange.org>) via the PRIDE partner repository under the accession number PRIDE: PXD027597.<sup>62</sup> This data will be publicly available at the date of publication. Accession numbers are listed in the [key resources table](#). Clinical data is provided in supplementary tables.

The pipeline for the analysis is available on GitHub [https://github.com/klevdiamanti/multitissue\\_ms\\_proteomics](https://github.com/klevdiamanti/multitissue_ms_proteomics). A web-based tool that allows visualization and exploration for levels of proteins across tissues is available on [http://bioinf.icm.uu.se:3838/multitissue\\_ms\\_proteomics/](http://bioinf.icm.uu.se:3838/multitissue_ms_proteomics/). Any additional information required to reanalyze the data reported in this paper is available from the [lead contact](#) upon request.

## EXPERIMENTAL MODEL AND SUBJECT DETAILS

### Ethics declaration

The collection and utilization of human organs for scientific research and transplantation purposes is regulated by the Swedish legislation. The human tissue lab is a biobank for multi-organ donors funded by the excellence of diabetes research in Sweden (EXODIAB) and is a collaborative initiative between the universities of Uppsala and Lund. Samples (n = 43) for five metabolically relevant tissues were obtained from the human tissue lab following the Uppsala Regional Ethics Committee approval (Dnr: 2014/391). Informed consent was received from the donors or their legal guardians for their organs to be used for scientific research. Storage and analysis of the samples has been in full accordance with the Swedish law and regional standard practices. No tissue samples were obtained from prisoners.

### Sample collection

Frozen samples of VAT, liver, skeletal muscle, pancreatic islets and serum were obtained for 43 multi-organ donors (Tables S1A and S1B). All subjects remained in the ICU mostly for 2–3 days (range 1–12) and brain death was the reported cause of death for all subjects. The world health organization guidelines were followed to identify T2D subjects in the corresponding medical facilities.<sup>63</sup> The percentage of HbA<sub>1c</sub> in the blood that indicates the average blood sugar levels over 3–4 weeks was analyzed according to hospital clinical routines established by the department of clinical chemistry at Uppsala university and with full accreditation. The assay is performed on an Afinion instrument from Abbot. PD was identified based on the percentage of glycosylated hemoglobin in blood ( $5.7\% \leq \text{HbA}_{1c} \leq 6.5\%$ ), while normoglycemia (CTRL) was assigned otherwise ( $\text{HbA}_{1c} \leq 5.6\%$ ) (Tables S1A and S1B).

GSIS was assessed in a dynamic perfusion system, Suprafusion 1000 (BRANDEL, Gaithersburg, MD). Twenty handpicked islets were perfused with low glucose (1.67 mM) for 42 min, high glucose (20 mM) for 48 min, and then low glucose again. Fractions were collected at 6 min intervals and the secreted insulin was measured by enzyme-linked immunosorbent assay (ELISA) (Merckodia, Uppsala, Sweden). In addition, purity of the pancreatic islet samples were estimated.<sup>64</sup> Information on characteristics of the anthropometric, technical, T2D-related and ICU-related variables was available for the study and was described in (Table S1B). We also explored merging PD with T2D and comparing to CTRL, additionally to merging PD with CTRL and comparing to T2D.

## METHOD DETAILS

### Mass spectrometry proteomics

#### Proteomic sample preparation

Skeletal muscle, VAT and liver samples were lysed in Sodium Deoxycholate containing lysis buffer (1% Sodium Deoxycholate (SDC), 10 mM Tris (2-carboxyethyl) phosphine (TCEP), 40 mM Chloroacetamide (CAA) and 100 mM of Tris (pH 8.5)). The samples were homogenized with an Ultra Turrax homogenizer (IKA). In case of the pancreatic islets extract, lysis buffer containing 10% 2,2,2-trifluoroethanol (TFE), 10 mM Tris (2-carboxyethyl) phosphine (TCEP), 40 mM Chloroacetamide (CAA) and 100 mM of Tris (pH 8.5) was used for protein extraction. For the serum samples, 1  $\mu\text{L}$  of serum was mixed with 24  $\mu\text{L}$  of 1% SDC buffer. Samples were boiled at 95°C for 10 min. Tissue samples were sonicated using a tip sonicator while serum samples were sonicated using water bath sonicator. Tissue lysates were then centrifuged at 16000 g for 10 min and the supernatant was collected for protein digestion. Proteins were digested using the endoproteases LysC and trypsin (1:100 w/w) at 37°C overnight with shaking. Digested peptides were acidified using 1% Trifluoroacetic acid (TFA) and purified using the StageTips containing SDB-RPS material and eluted in 1% ammonia and 80% acetonitrile. Peptides were concentrated, dried using Speed-vac and res-suspended in buffer containing 2% acetonitrile and 0.1% TFA.

#### Peptide libraries, high pH reversed-phase fractionation

For serum, skeletal muscle, VAT and liver we used peptide libraries generated in house for quantification based on data-independent acquisition (DIA). To generate the library for the pancreatic islets, 15  $\mu\text{g}$  of peptides were pooled from few samples and fractionated using high pH reversed-phase chromatography.<sup>65</sup> Sixteen fractions were automatically concatenated using a rotor valve shift of 90 s. Approximately 0.3  $\mu\text{g}$  of each fraction were subjected to LC-MS/MS measurements via data-dependent acquisition (DDA).

#### Mass spectrometry

Peptides were measured using LC-MS instrumentation consisting of an Easy nanoflow HPLC system (Thermo Fisher Scientific, Bremen, Germany) coupled via a nanoelectrospray ion source (Thermo Fisher Scientific, Bremen, Germany) to a Q Exactive HF-X mass

spectrometer. Purified peptides were separated on a 50 cm C18 column (inner diameter 75  $\mu\text{m}$ , 1.8  $\mu\text{m}$  beads, Dr. Maisch GmbH, Germany). Peptides from the tissue samples were loaded onto the column with buffer A (0.5% formic acid) and eluted with a 100 min linear gradient increasing from 2–40% buffer B (80% acetonitrile, 0.5% formic acid). For the peptides from serum samples 45 min linear gradient was used. After the gradient, the column was washed with 90% buffer B and re-equilibrated with buffer A.

Mass spectra were acquired in either DDA or DIA mode. For the pilot experiment where samples from six subjects were analyzed, data for tissue samples was obtained in DDA while the serum data was acquired in DIA mode. For the main experiments, data for all samples was acquired in DIA mode. For the pancreatic islets extract, the library samples were measured in DDA mode. For the DDA method, the mass spectra were acquired with automatic switching between MS and MS/MS using a top 15 method. MS spectra were acquired in the Orbitrap analyzer with a mass range of 300–1750  $m/z$  and 60,000 resolutions at  $m/z$  200 with a target of  $3 \times 10^6$  ions and a maximum injection time of 25 ms. HCD peptide fragments acquired at 27 normalized collision energy were analyzed at 15000 resolution in the Orbitrap analyzer with a target of  $1 \times 10^5$  ions and a maximum injection time of 28 ms. A DIA MS method was used for all tissue proteome measurements in which one full scan (300 to 1650  $m/z$ , resolution = 60,000 at 200  $m/z$ ) at a target of  $3 \times 10^6$  ions was first performed, followed by 32 windows with a resolution of 30000 where precursor ions were fragmented with higher-energy collisional dissociation (stepped collision energy 25%, 27.5%, 30%) and analyzed with an AGC target of  $3 \times 10^6$  ions and maximum injection time at 54 ms in profile mode using positive polarity. For the serum samples, a DIA MS method in which one full scan (300 to 1650  $m/z$ , resolution = 120,000 at 200  $m/z$ ) at a target of  $3 \times 10^6$  ions was first performed, followed by 22 windows with a resolution of 30000 where precursor ions were fragmented with higher-energy collisional dissociation (stepped collision energy 25%, 27.5%, 30%) and analyzed with an AGC target of  $3 \times 10^6$  ions and maximum injection time at 54 ms in profile mode using positive polarity.

## QUANTIFICATION AND STATISTICAL ANALYSIS

### Data processing

Raw MS files from the experiments measured in the DDA mode (pancreatic islets library & tissue samples from pilot experiments) were processed using MaxQuant.<sup>66</sup> MS/MS spectra were searched by the Andromeda<sup>67</sup> search engine (integrated into MaxQuant) against the decoy UniProt-human database (downloaded in December 2017) with forward and reverse sequences.<sup>68</sup> In the main Andromeda search precursor, mass and fragment mass were matched with an initial mass tolerance of 6 ppm and 20 ppm, respectively. The search included variable modifications of methionine oxidation and N-terminal acetylation and fixed modification of carbamidomethyl cysteine. The false discovery rate (FDR) was estimated for peptides and proteins individually using a target-decoy approach allowing a maximum of 1% false identifications from a reversed sequence database. Raw files acquired in the DIA mode were processed using Biognosys Spectronaut software version 13.<sup>69</sup> A single peptide library was generated in Spectronaut using the combined MaxQuant search results for the DDA runs from the pancreatic islets sample. The experimental DIA runs were then analyzed in Spectronaut using default settings.

### Computational analysis

We used precompiled gmt files containing collections of GO terms (C5 release September 19, 2020) and biological pathways for KEGG and Reactome (C2 release September 19, 2020) from the molecular signatures database (MSigDB v7.2).<sup>70–74</sup> The collection of gmt files was initially used to compile a universe of unique gene names. For each quantified protein, DIA provides an ordered list of UniProt identifiers and gene names ranked based on statistical confidence. The universe was used as means to decide on the unique gene names that most accurately represent the quantified proteins. If one or more identifiers from the ordered list intersected with the universe then the first hit from the ordered list was selected, otherwise the first, and most significant, of the three identifiers was used.

Raw data was  $\log_2$ -transformed to better approximate a normal distribution and proteins identified in at least 80% of the samples were retained for downstream analysis (Table S1E). Abundancies of proteins corresponding to the same gene in each tissue were averaged within samples. Samples with consistent large deviations from the median abundancies of all samples across tissues were excluded from the analysis (Figure S1A and Table S1E) and normalization was performed using median sweeping (Figures S1B and S1C). Missing protein levels were strongly biased for proteins located on the lower end of the detection limit (Figure S1D); hence, in order to impute the missing values, we selected a method that draws random values from a truncated distribution with parameters estimated from quantile regression (QRILC) using the function *impute.QRILC* from the R package *imputeLCMD* (Figure S1E).

### Differential analysis

The differential analysis was performed on pairwise comparisons among CTRL, PD and T2D, and the merged groups CTRL + PD and PD + T2D using the R package *limma*.<sup>75</sup> The differential models were corrected for confounding factors explaining  $\geq 1\%$  of the median variance across proteins in at least one tissue (Table S1F).<sup>76</sup> Raw p values were FDR-corrected to q-values, and they were subsequently combined with the log-fold change (logFC) to compute  $\pi$ -values:  $\pi = \log_{10}(\text{logFC}) \times -\log_{10}(\text{q-value})$ .<sup>77,78</sup>

### GO and pathway enrichment analysis

Lists of proteins ranked on  $\pi$ -values from the differential analysis were imported into the functions *cameraPR* and *fgsea* from the R packages *limma* and *fgsea*, respectively. *cameraPR* was executed on default settings, while *fgsea* was set to perform 1,000,000

permutations, and to consider only terms with  $\geq 5$  and  $\leq 300$  proteins. For both methods the enrichment of GO terms and biological pathways was performed separately using the *gmt* files described above and the raw p-values were corrected for multiple testing using the R package *qvalue*. As the collection of enriched GO terms and pathways the intersection of the significant terms ( $q < 0.05$ ) sharing the same direction of change in both methods was considered.

Enrichment analysis of biological terms for pre-defined sets of proteins identified only in one tissue (tissue-specific) and shared among tissues (tissue-shared) was performed using a hypergeometric test. The background set for tissue-shared proteins was the union of proteins identified across tissues, while as background set for tissue-specific proteins was used the collection of proteins in the respective tissue. Sets with  $\geq 5$  and  $\leq 300$  proteins were retained, and p-values were corrected for multiple testing using the R package *qvalue*.

**Cell Reports Medicine, Volume 3**

**Supplemental information**

**Organ-specific metabolic pathways distinguish  
prediabetes, type 2 diabetes, and normal tissues**

**Klev Diamanti, Marco Cavalli, Maria J. Pereira, Gang Pan, Casimiro Castillejo-López, Chanchal Kumar, Filip Mundt, Jan Komorowski, Atul S. Deshmukh, Matthias Mann, Olle Korsgren, Jan W. Eriksson, and Claes Wadelius**

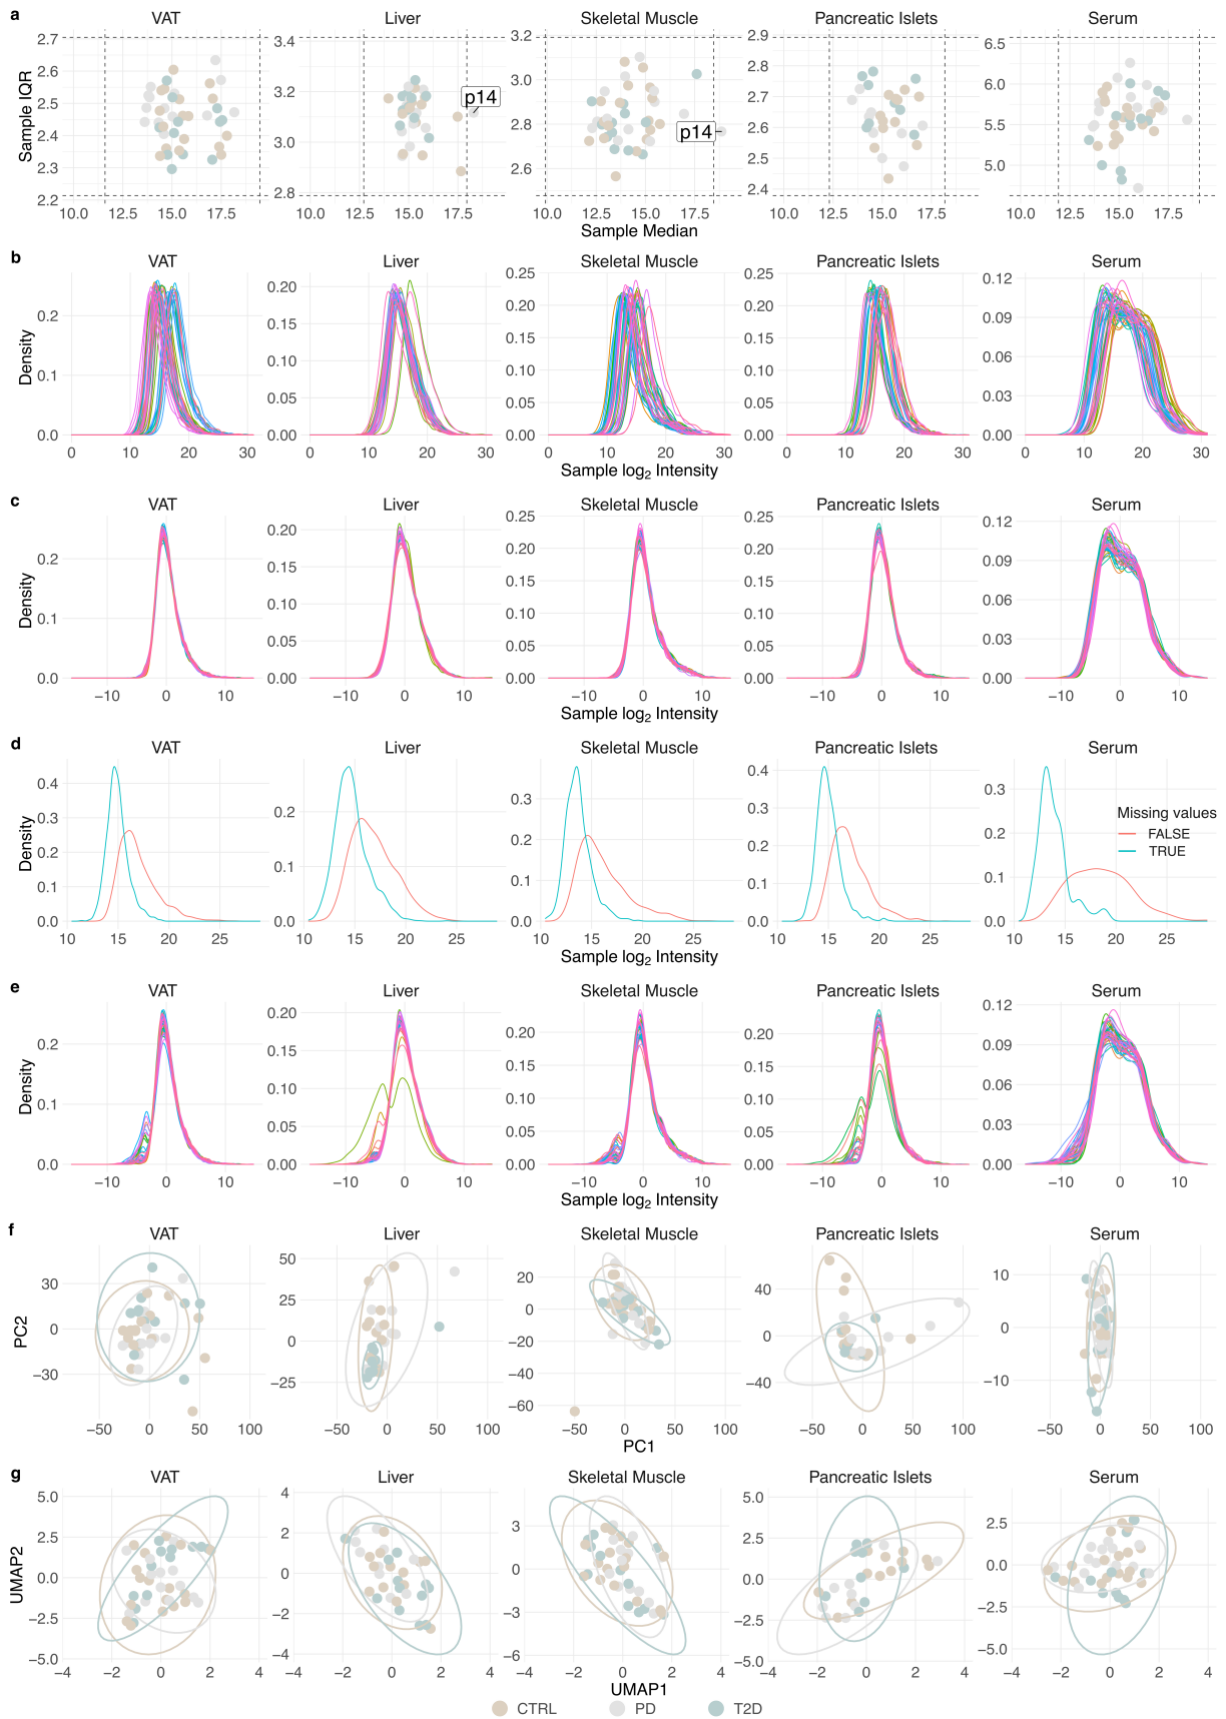

**Figure S1: Quality control of MS proteomics data in each tissue.** **a)** Median expression level of all proteins of each sample (x axis) against the interquartile range (IQR) of the expressed proteins in each sample (y axis). The dotted frame indicates  $\pm 3$  standard deviations (SDs) from the average median of all samples and the average IQR of all samples, respectively. Labelled samples deviate more than 3 SDs from the averages. **b)** Distribution of raw

$\log_2$ -transformed protein levels. Each line represents one sample. **c)** Distribution of median-shifted normalized protein levels. **d)** Distribution of the abundance of proteins with and without missing values. **e)** Distribution of protein abundancies after QRILC lower-tail imputation. **f)** The two first principal components (PCs) from the principal component analysis (PCA) that was performed on the normalized imputed dataset using the *pca* function from the R package *pcaMethods* with the selected method being “ppca”. **g)** The two first components from the uniform manifold approximation and projection (UMAP) that was performed on the normalized imputed dataset. The number of neighbors for UMAP was set to five.





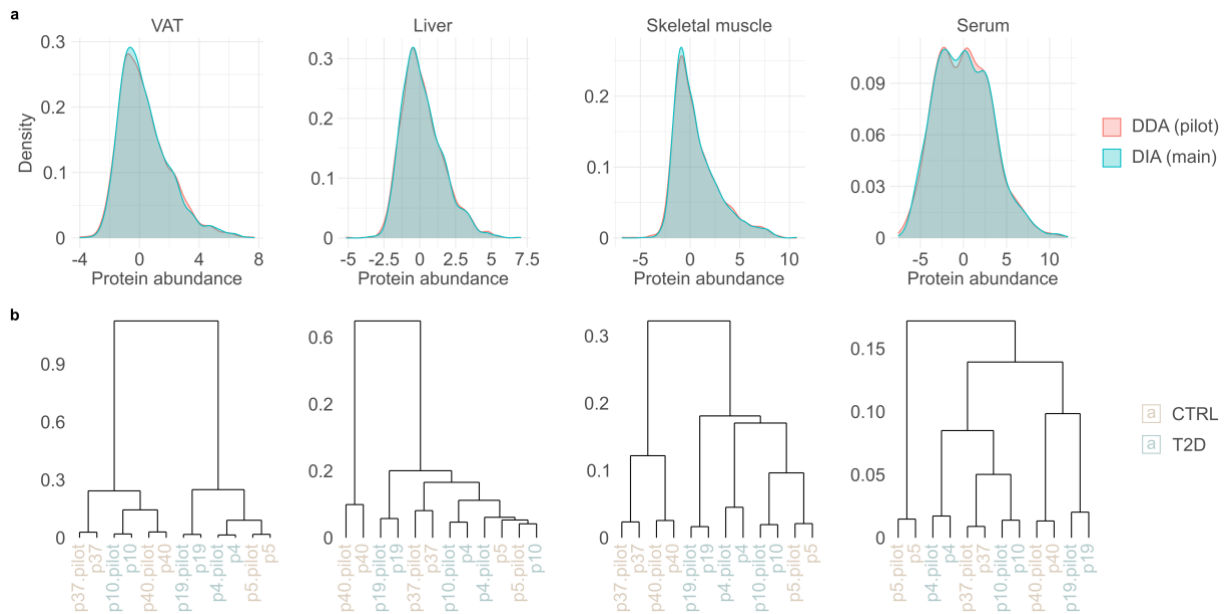

**Figure S3: Comparison and clustering of six samples that were analyzed in both pilot and main analyses.**

Pancreatic islets were excluded from the analysis due to low quality of four samples, which were consequently excluded from the main analysis. Samples included in this analysis are equally distributed between CTRL and T2D. Pilot study is marked as data-dependent acquisition (DDA) and the main one as data-independent acquisition (DIA). The data was  $\log_2$ -transformed and the set of shared top-500 most abundant proteins was analyzed. Batch effect was corrected using the function *removeBatchEffect* from the R package *limma*.

**a)** Distribution of proteins in the pilot and main run after batch effect correction. **b)** Hierarchical clustering (HC) of DDA and DIA samples. DDA samples were marked with the suffix “pilot”. *1-r*, where *r* is Pearson correlation coefficient, was used as the distance metric and the *ward.D* algorithm was used for the HC.



**Figure S4: Investigation of the misclassified sample p42 from skeletal muscle.** **a)** Zoom into the hierarchical clustering (HC) from (Figure 1c) for VAT and skeletal muscle. **b)** Number of the top 300 most abundant proteins shared between VAT and skeletal muscle that are closer to sample p42 from skeletal muscle. Proteins for each group defined from HC have been collapsed to the average of their respective groups. **c)** Top 10 most significantly enriched GO terms from the GO enrichment analysis performed on the lists of proteins of each group in *b*. **d)** Expression of the top 300 most abundant proteins shared between VAT and skeletal muscle. p42 in skeletal muscle is shown independently while proteins from the other groups were collapsed to the average of the respective group.

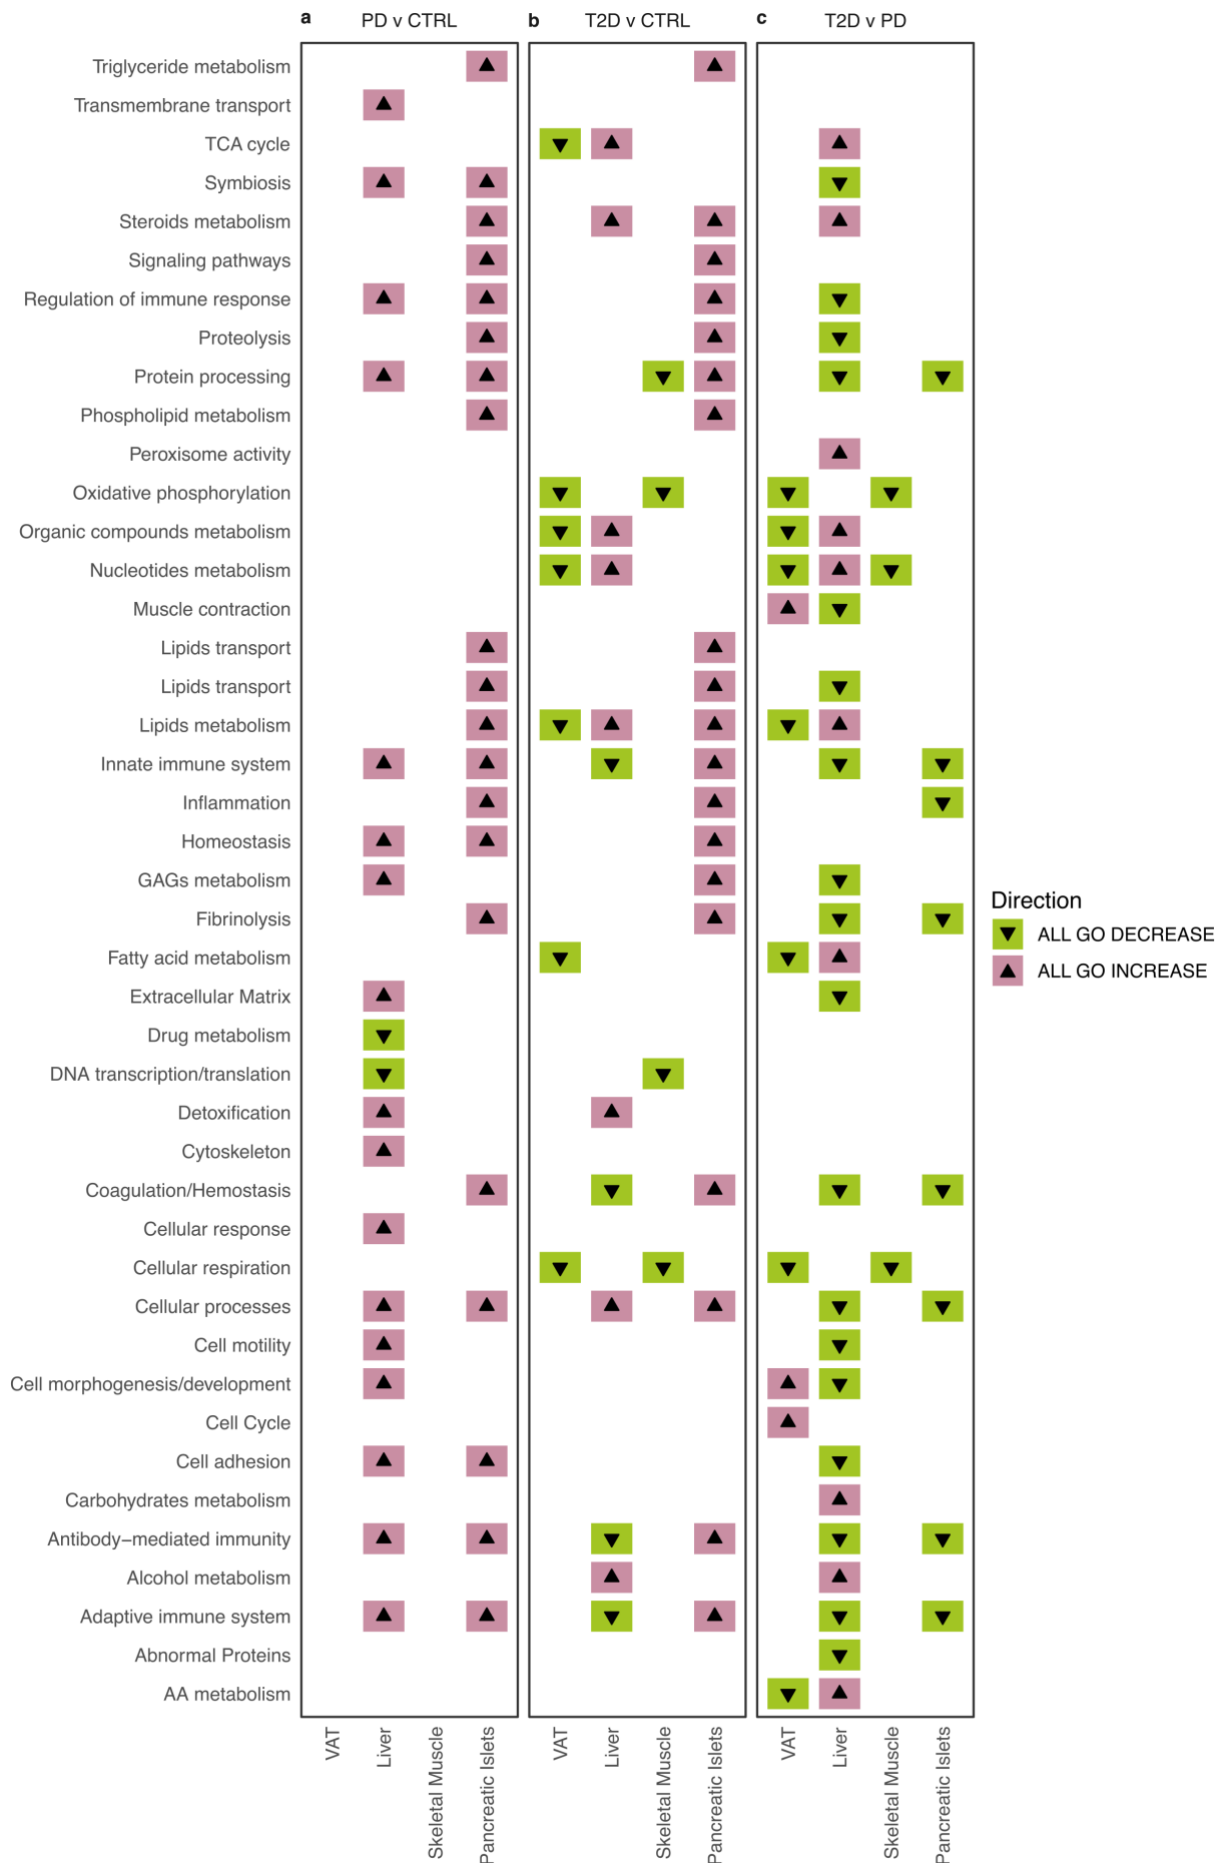

**Figure S5: Direction of change for curated groups of GO terms for significantly enriched biological processes ( $q < 0.01$ ).** a-c) Panels represent pair-wise comparisons of phenotypes, columns represent tissues and rows represent curated groups of GO terms for biological processes. A combination of a triangle pointing upwards and a pink background color implies increase in the group, while those pointing downwards in combination with green background imply decrease. A graphic representation of the individual GO terms and as well as the curated groups is shown in (Figure 2), and detailed information on grouping and significance is shown in (Table S1m).

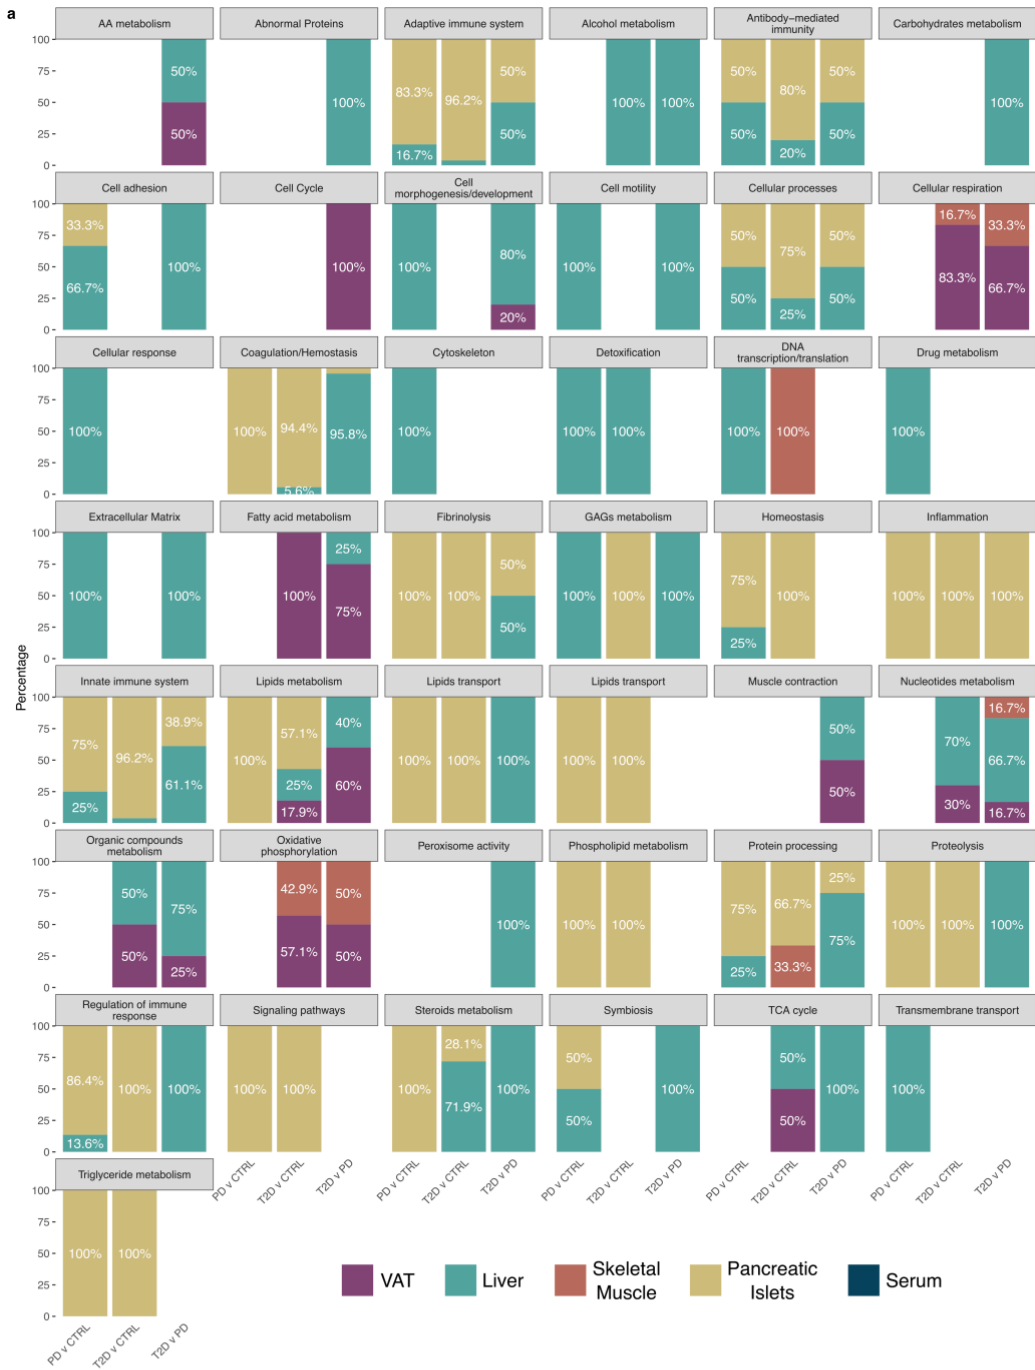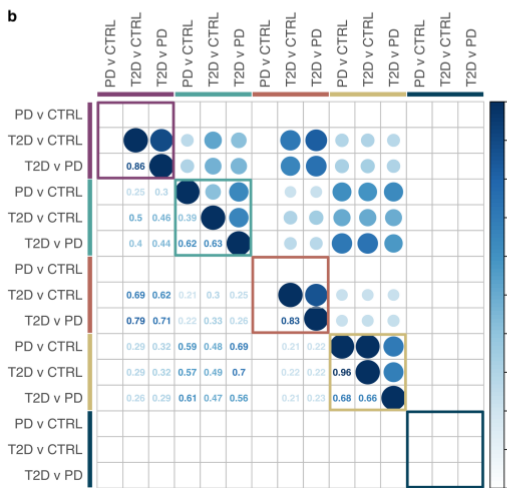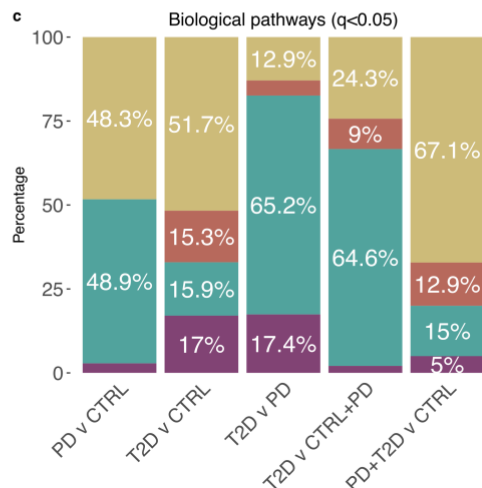

**Figure S6: Distributions and similarities of enriched GO biological processes and biological pathways across tissues for pairwise comparisons of CTRL, PD, T2D, and their merged groups CTRL+PD and PD+T2D.** **a)** Distribution of enriched GO biological processes ( $q < 0.01$ ) across curated groupings and pair-wise phenotype comparisons among CTRL, PD and T2D. For groups of GO biological processes from (Figure 2) the fraction of terms from tissues of origin was calculated. Details on the groups are shown in (Table S1m). **b)** Similarity of GO biological terms for pair-wise comparisons of CTRL, PD and T2D across tissues. The similarity analysis was performed on sets of enriched GO biological processes ( $q < 0.01$ ) using the function *mgoSim* from the R package *GOSemSim* to obtain a combined similarity score with parameters *measure="Wang"* and *combine="BMA"*. **c)** Distribution of enriched biological pathways at 5% FDR corresponding to (Figure 3 and Table S1n).



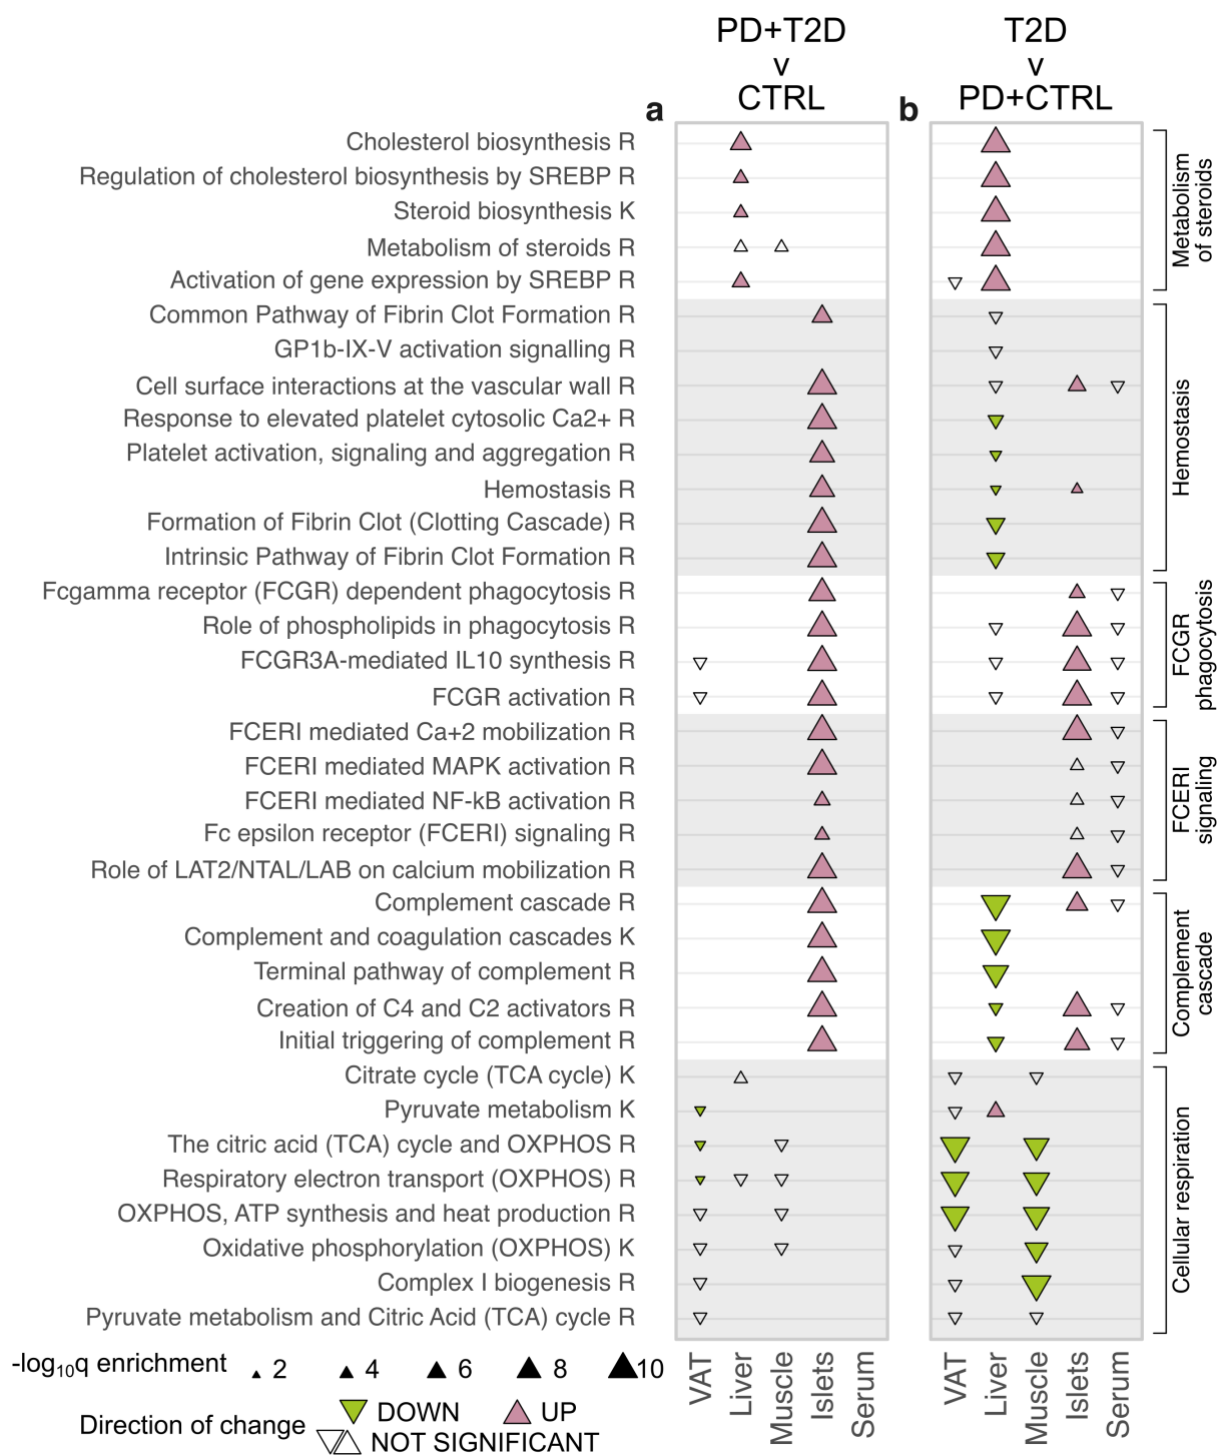

**Figure S7: Selected groups of enriched biological pathways ( $q \leq 0.05$ ) for comparisons of the merged groups of CTRL+PD and PD+T2D to T2D and CTRL, respectively.** The plot contains an identical set to the one shown in (Figure 3). Colored triangles indicate statistical significance ( $q < 0.05$ ) and direction. Rows represent pathways, panels represent pair-wise comparisons and columns within panels represent tissues. The database of origin for each pathway is noted with a suffix R or K implying Reactome or KEGG, respectively. A full list of enriched pathways is shown in (Table S1n). Sterol regulatory element binding proteins have been abbreviated as SREBP and Glycoprotein Ib-IX-V has been abbreviated as GP1b-IX-V.

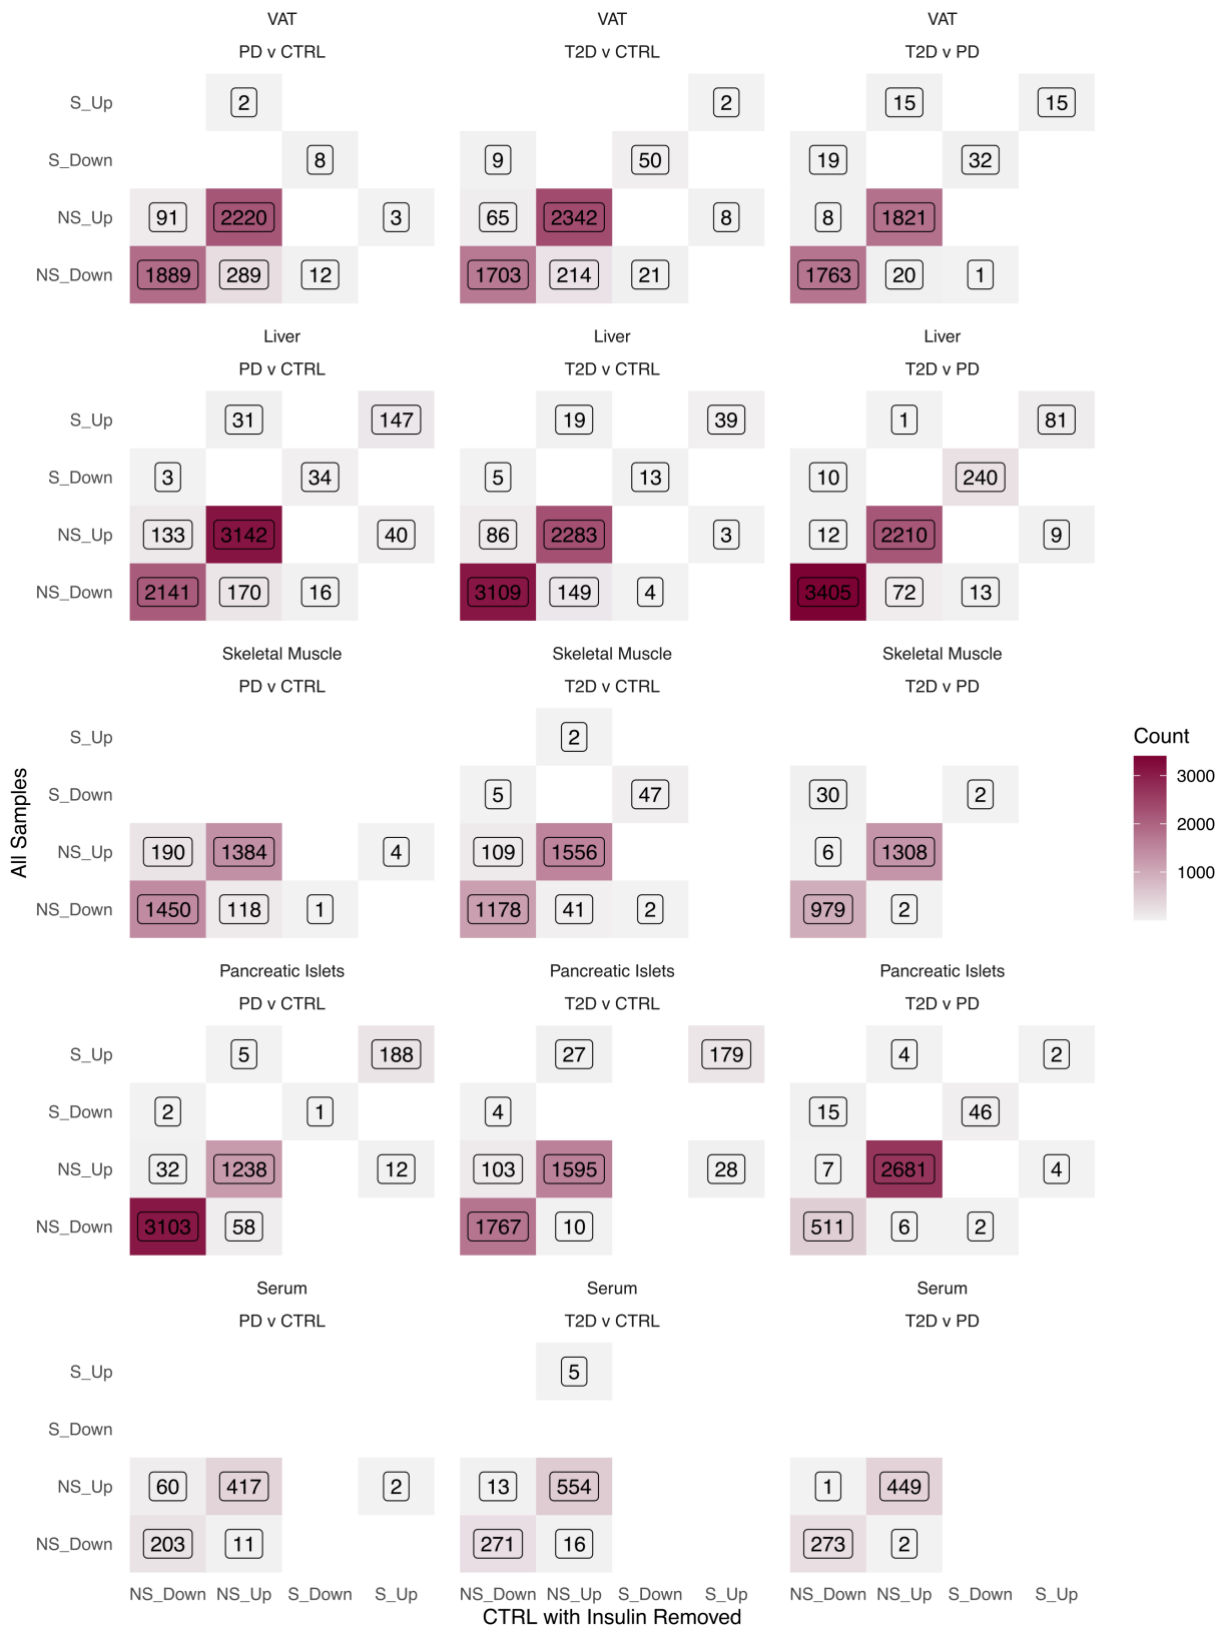

**Figure S8: Aggregated count of significance and enrichment direction of GO terms and biological pathways before and after exclusion of the three subjects from CTRL that were administered insulin while in ICU.** Each tile represents count of significance and direction of enrichment of biological pathways and GO terms between the original and the recomputed set of results after exclusion of the three subjects from CTRL that were administered insulin while in ICU. X-axis represents GO terms and pathways from the original analysis, and y-axis represents GO terms and pathways from the analysis excluding these three subjects. Labels

in both axes are named after A\_B, where “A” represents significance (S) or Non-Significance (NS), and “B” represents enrichment direction Up or Down.

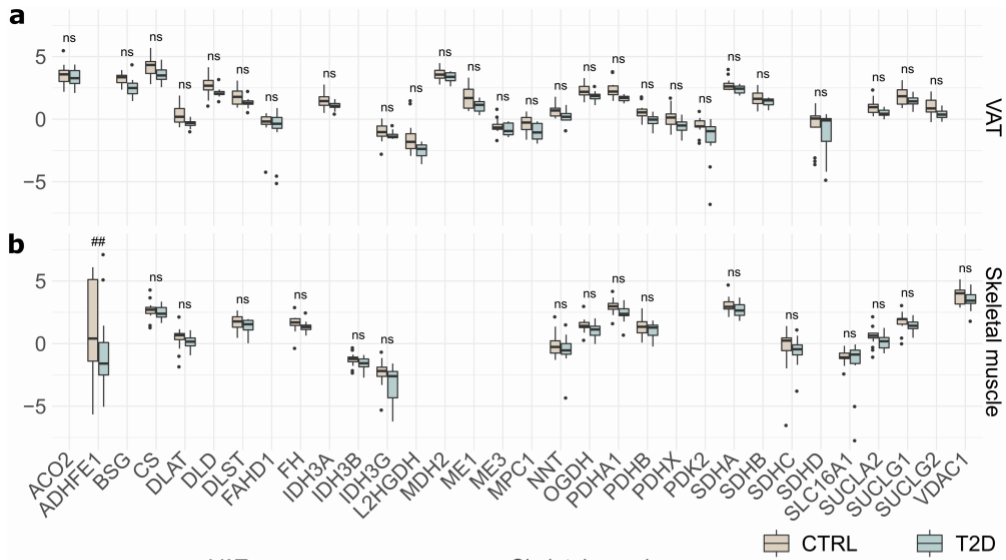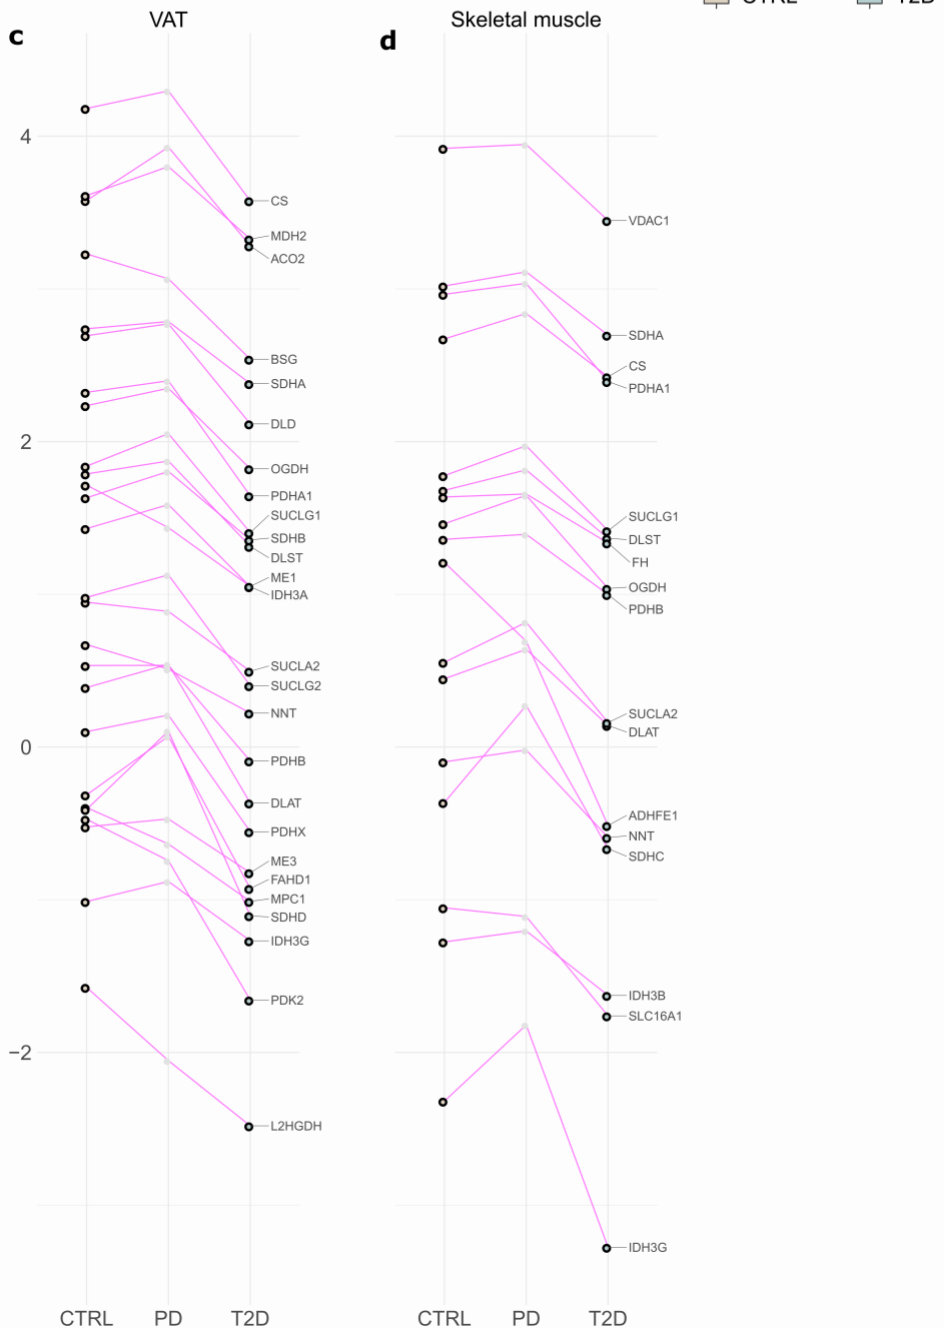

**Figure S9: Details on levels of proteins for TCA cycle and pyruvate metabolism in VAT and skeletal muscle for T2D and CTRL.** **a-b)** The two boxplots display differences in expression levels in **a)** VAT and **b)** skeletal muscle samples between CTRL and T2D. \*\*\*:  $\pi \leq 2.1281$ , \*\*:  $\pi \leq 1.1733$ , \*:  $\pi \leq 0.6274$ , #:  $\pi \leq 0.4292$ , ##:  $\pi \leq 0.2572$ , ns:  $\pi > 0.2572$ . **c-d)** The two bottom plots illustrate the overall trend of changes in expression of proteins characterized as driving for the TCA cycle and pyruvate metabolism pathway across CTRL, PD and T2D in **c)** VAT and **d)** skeletal muscle. Dots show average protein expression and a black circle around dots marks the outcomes that are being compared in the current example. Lines are used to mark alterations across phenotypes for a given protein.

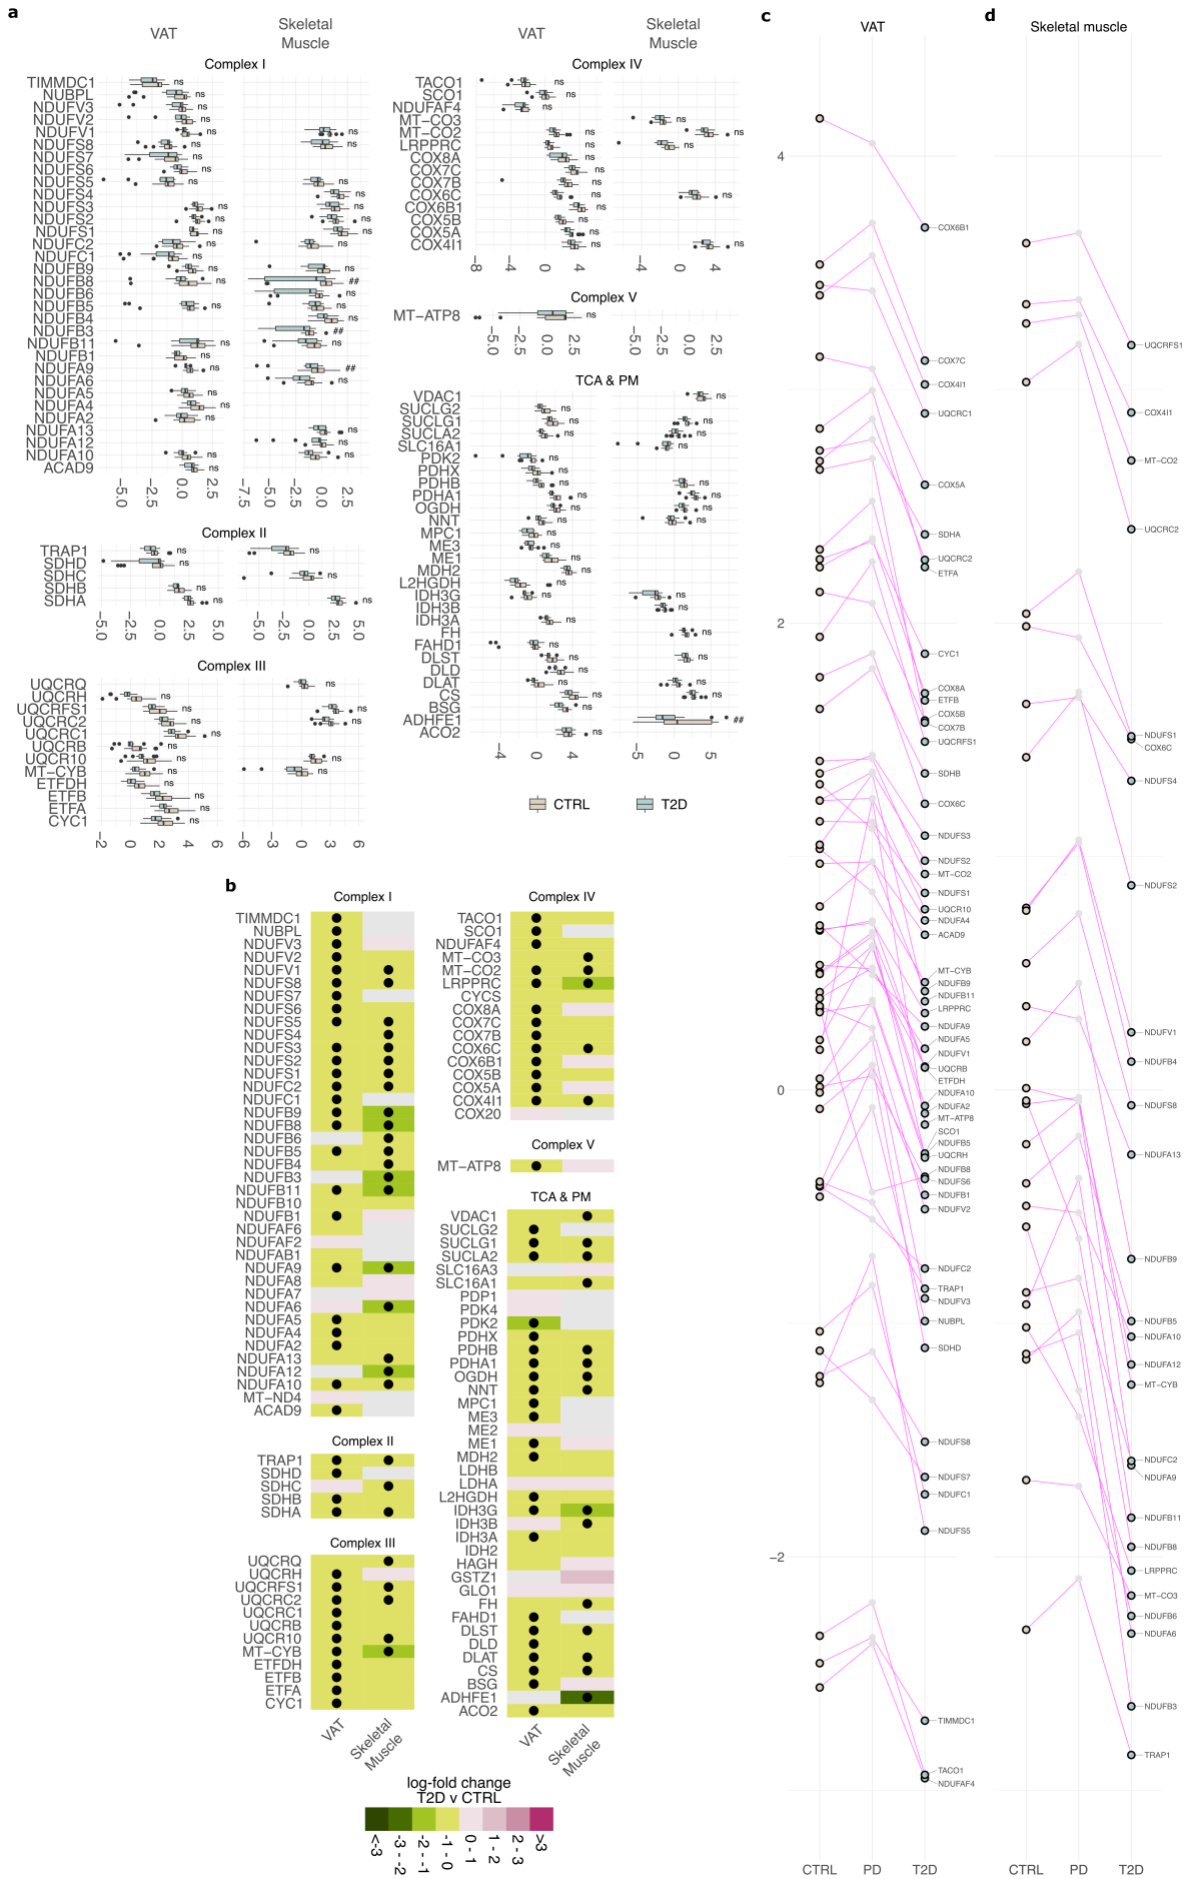

**Figure S10: Details on levels of proteins for oxidative phosphorylation, ATP synthesis by chemiosmotic coupling, and heat production by uncoupling proteins in VAT and skeletal muscle for T2D and CTRL.**

**a-b)** Boxplot and heatmap were stratified based on mitochondrial protein complexes. Mitochondrial complexes were obtained from the HUGO database (group 639) release January 31, 2021. **a)** Boxplots display differences in expression levels in VAT and skeletal muscle samples between CTRL and T2D. \*\*\*:  $\pi \leq 2.1281$ , \*\*:  $\pi \leq 1.1733$ , \*:  $\pi \leq 0.6274$ , #:  $\pi \leq 0.4292$ , ##:  $\pi \leq 0.2572$ , ns:  $\pi > 0.2572$ . **b)** Heatmap shows log-fold change of proteins identified in VAT and skeletal muscle. Black dots mark driving proteins in altering the pathway. Grey tiles mark non identified proteins in the respective tissue. **c-d)** Overall trend of changes in expression of proteins characterized as driving for the oxidative phosphorylation, ATP synthesis by chemiosmotic coupling, and heat production by uncoupling proteins pathway across CTRL, PD and T2D for **c)** VAT and **d)** skeletal muscle. Dots show average protein expression and a black circle around dots marks the outcomes that are being compared in the current example. Lines are used to mark alterations across phenotypes for a given protein.

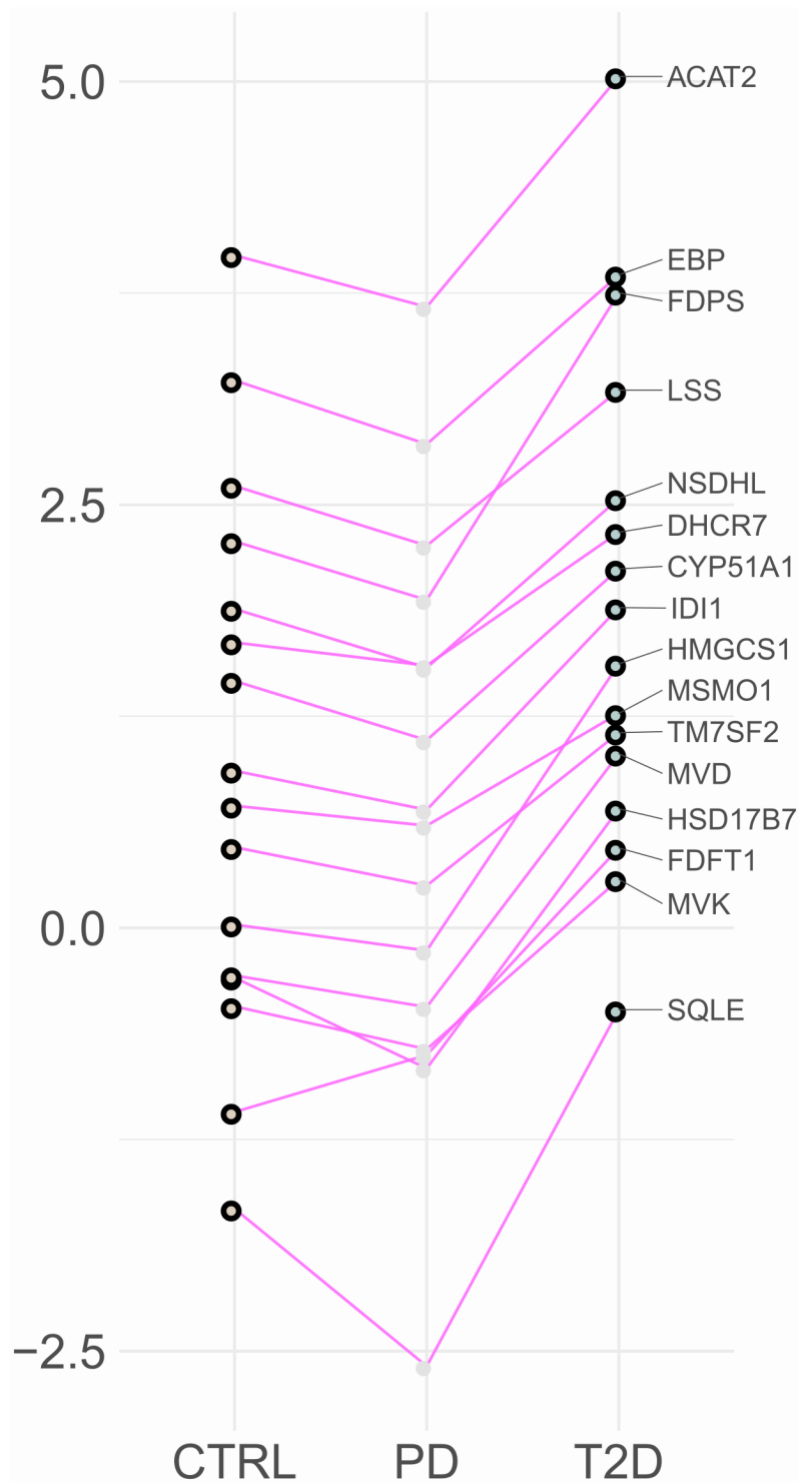

**Figure S11: Overall trend of changes in expression of proteins characterized as driving for the cholesterol biosynthesis pathway in liver across CTRL, PD and T2D.** Dots show average protein expression and a black circle around dots marks the outcomes that are being compared in the current example. Lines are used to mark alterations across phenotypes for a given protein.



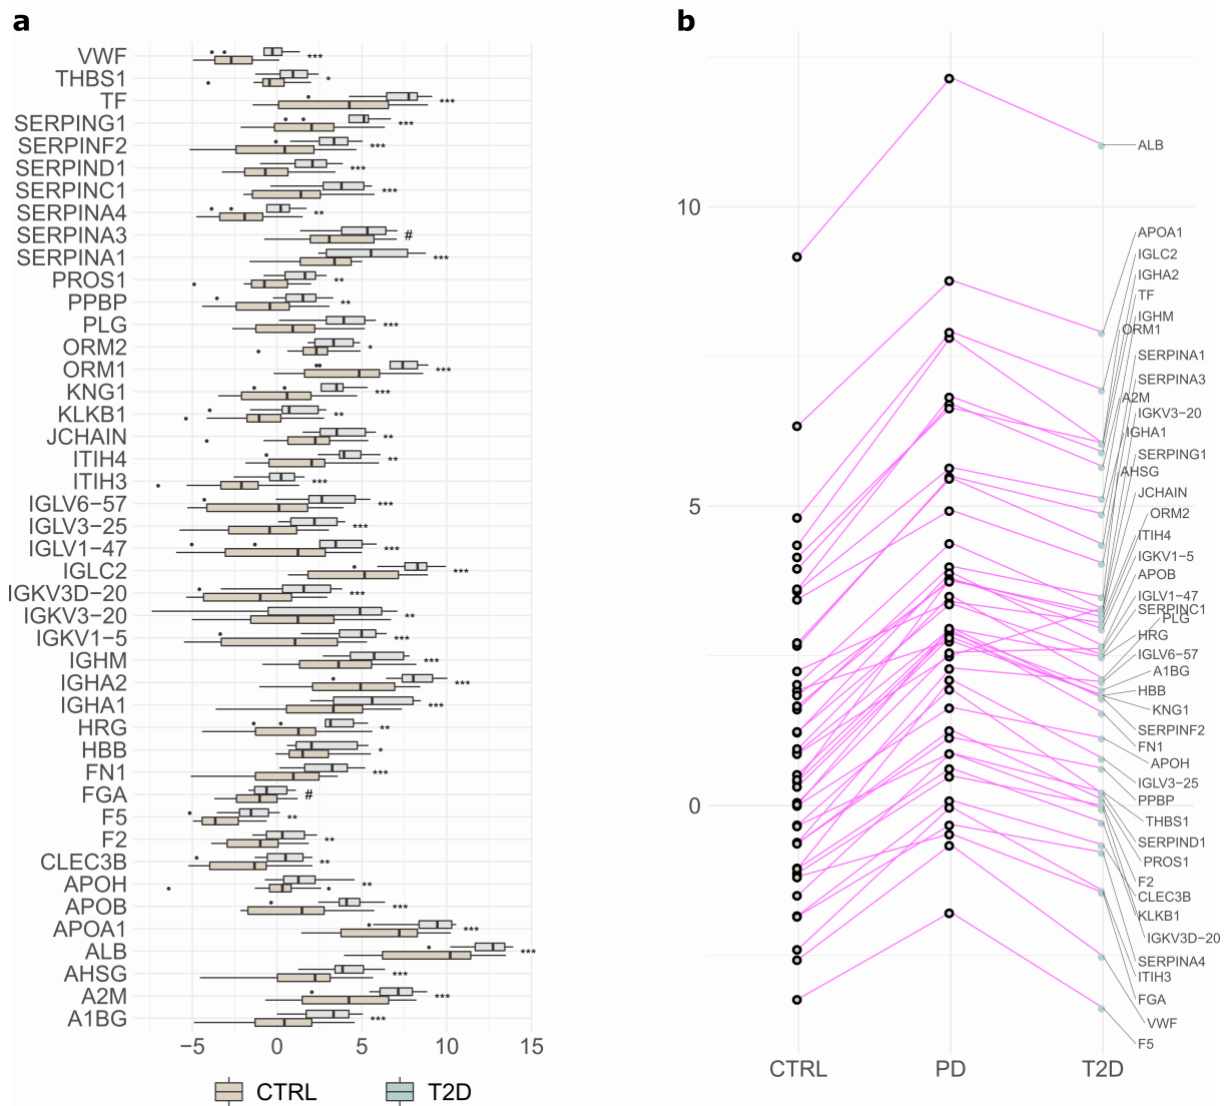

**Figure S12: Details on levels of proteins for hemostasis in pancreatic islets for PD and CTRL.**  
**a)** Differences in expression levels between CTRL and PD. \*\*\*:  $\pi \leq 2.1281$ , \*\*:  $\pi \leq 1.1733$ , \*:  $\pi \leq 0.6274$ , #:  $\pi \leq 0.4292$ , ##:  $\pi \leq 0.2572$ , ns:  $\pi > 0.2572$ . **b)** Overall trend of changes in expression of proteins characterized as driving for the hemostasis pathway in pancreatic islets across CTRL, PD and T2D. Dots show average protein expression and a black circle around dots marks the outcomes that are being compared in the current example. Lines are used to mark alterations across phenotypes for a given protein.

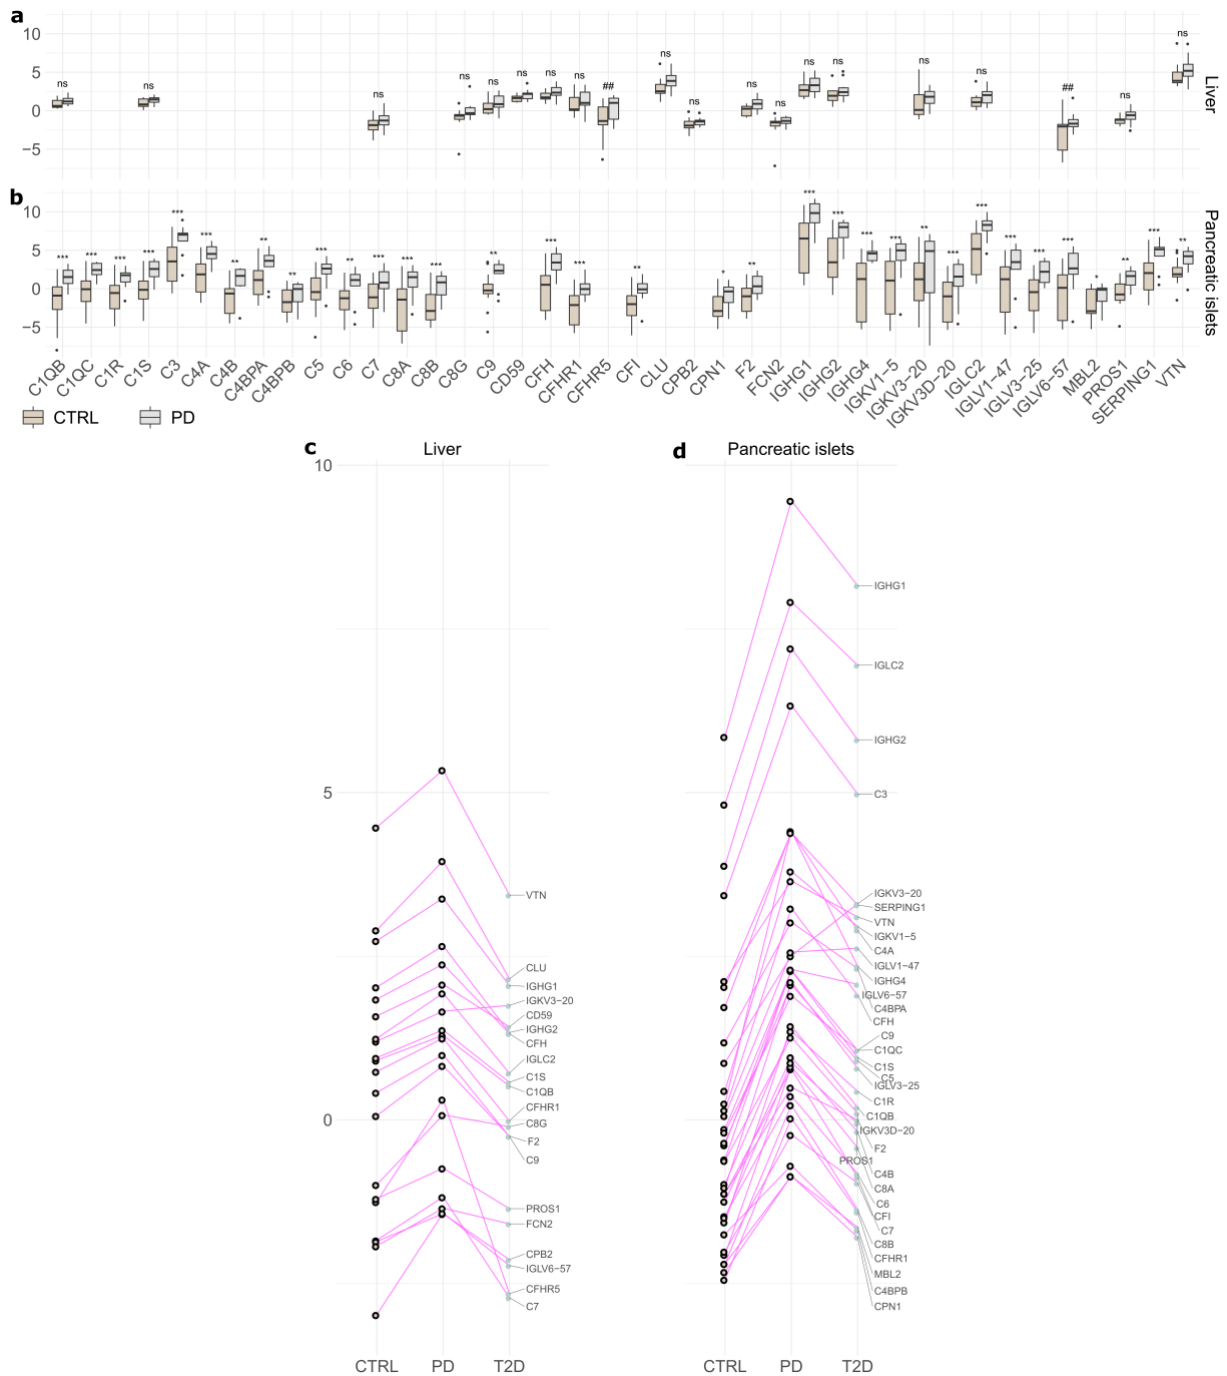

**Figure S13: Details on levels of proteins for complement cascade in liver and pancreatic islets for PD and CTRL.** **a-b)** The boxplots display differences in expression levels from **a)** liver and **b)** pancreatic islets samples between CTRL and PD. \*\*\*:  $\pi \leq 2.1281$ , \*\*:  $\pi \leq 1.1733$ , \*:  $\pi \leq 0.6274$ , #:  $\pi \leq 0.4292$ , ##:  $\pi \leq 0.2572$ , ns:  $\pi > 0.2572$ . **c-d)** Overall trend of changes in expression of proteins characterized as driving for the complement cascade pathway across CTRL, PD and T2D in **c)** liver and **d)** pancreatic islets. Dots show average protein expression and a black circle around dots marks the outcomes that are being compared in the current example. Lines are used to mark alterations across phenotypes for a given protein.
